1  
2  
3  
4  
5  
6  
7  
8  
9  
10  
11  
12  
13  
14  
15  
16  
17  
18  
19  
20  
21  
22  
23  
24  
25  
26  
27  
28  
29

# Deep learning for robust and flexible tracking in behavioral studies for *C. elegans*

Kathleen Bates<sup>1,2, +</sup>, Kim Le<sup>3, +</sup>, and Hang Lu<sup>\*, 1,2,3</sup>

<sup>1</sup> Interdisciplinary Program in Bioengineering, Georgia Institute of Technology, Atlanta, Georgia, USA

<sup>2</sup> School of Chemical & Biomolecular Engineering, Georgia Institute of Technology, Atlanta, Georgia, USA

<sup>3</sup> Wallace H. Coulter Department of Biomedical Engineering, Georgia Institute of Technology and Emory University, Atlanta, Georgia, USA

\*Author for correspondence: [hang.lu@gatech.edu](mailto:hang.lu@gatech.edu)

+ These authors contributed equally

## ABSTRACT

Robust and accurate behavioral tracking is essential for ethological studies. Common methods for tracking and extracting behavior rely on user adjusted heuristics that can significantly vary across different individuals, environments, and experimental conditions. As a result, they are difficult to implement in large-scale behavioral studies with complex, heterogenous environmental conditions. Recently developed deep-learning methods for object recognition such as Faster R-CNN have advantages in their speed, accuracy, and robustness. Here, we show that Faster R-CNN can be employed for identification and detection of *Caenorhabditis elegans* in a variety of life stages in complex environments. We applied the algorithm to track animal speeds during development, fecundity rates and spatial distribution in reproductive adults, and behavioral decline in aging populations. By doing so, we demonstrate the flexibility, speed, and scalability of Faster R-CNN across a variety of experimental conditions, illustrating its generalized use for future large-scale behavioral studies.

## 30 INTRODUCTION

31 Ethology has been crucial in the fields of neuroscience, genetics, and aging (Anderson and Perona  
32 2014; Krakauer et al. 2017; Brown and De Bivort 2018; Niepoth and Bendesky 2020) . This rings  
33 true even in the simplified *C. elegans* model, which has been used to probe a variety of  
34 ethological questions (Hedgecock and Russell 1975; Chalfie et al. 1985; Gray et al. 2005; Stephens  
35 et al. 2008; Brown et al. 2013; Brown et al. 2016) . In these experiments, it is extremely valuable  
36 to robustly and accurately track and measure the behavior of *C. elegans* on a large scale. The  
37 ability to collect large-scale behavioral data has significantly improved throughout the years.  
38 While many behavioral assays consist of manually recording small populations on agar plates  
39 under a stereomicroscope, recent automated methods have drastically increased the variety of  
40 biological questions researchers can explore. Ranging from multi-camera systems, to time-shared  
41 imaging systems, to low-cost imaging systems, advances in hardware have allowed users to more  
42 easily obtain large amounts of raw behavior video (Stroustrup et al. 2013; Churgin et al. 2017;  
43 Maia Chagas et al. 2017; Stern et al. 2017; Le et al. 2020) . In addition to improvements in data  
44 acquisition, there have been advances in culture methods, which enable the exploration of more  
45 complex environmental conditions. These range from individual “arenas”, which allow the  
46 tracking of populations with individual level resolution, to microfluidic devices, which allow for  
47 precise spatiotemporal environmental control (Chung et al. 2011; Zhang et al. 2016; Churgin et  
48 al. 2017) . While these technological advancements have enabled the ability to explore complex  
49 behavior relevant to neuroscience and aging, this increase in behavioral recordings and data  
50 shifts the bottleneck to the analysis of large-scale image datasets. This is especially crucial for  
51 images taken in heterogeneous environments, such as those in more complex, naturalistic  
52 conditions.

53 One of the major challenges in analyzing behavioral data is the detection and identification of  
54 the object of interest, especially under a variety of imaging and environmental conditions. While  
55 there are many existing image processing tools that are currently used to detect, identify, and  
56 subsequently analyze the behavior of worms (Swierczek et al. 2011; Javer et al. 2018), there are  
57 unmet needs. These tools often use traditional image processing methods, such as background  
58 subtraction, thresholding based on the color or intensity of the object, or the use of  
59 morphological features (such as size), to detect and identify the object of interest. For example,  
60 in the popular worm tracker Tierpsy Tracker (Javer et al. 2018), users manually optimize  
61 parameters based on experimental conditions and are subsequently able to extract behavioral  
62 data from their dataset. With these segmentation and tracking tools, users can extract a variety  
63 of informative behavioral phenotypes, such as size, speed of movement, and the posture of  
64 individuals. However, with the advent of more complex experimental setups that introduce more  
65 heterogeneous experimental or environmental conditions, it is not straightforward to adapt  
66 these traditional methods to robustly and accurately detect objects of interest. For example, in  
67 conditions with low or uneven imaging contrast, basic thresholding based on intensity values may  
68 not be accurate. If animals or the objects of interest move only subtly, background subtraction  
69 cannot be used to easily differentiate between the object of interest and the background of the

70 image. Additionally, if there is a wide range in morphological properties, such as the dramatic  
71 size change of animals during development, it is difficult to rely on traditional morphological  
72 features such as size as a method of identifying objects of interest. Thus, coupled with the  
73 increased scale of behavioral datasets, there is a need for a robust, flexible, and facile method to  
74 detect and identify worms that would be able to work across a variety of different experimental  
75 conditions, with minimal user input.

76 To address this problem, we turn towards deep learning, which has emerged as a powerful data-  
77 driven tool for object detection. While there are many deep learning object detection methods,  
78 the Faster R-CNN architecture is a widely-used method that uses region proposal networks (RPN)  
79 coupled with convolutional neural networks (CNN) to extract the location (in the form of  
80 bounding boxes) and estimated likelihood for each detected object (Ren et al. 2015) . It is one of  
81 the top performing object detection methods, as measured by the mean average precision (mAP)  
82 of detections on the standardized COCO dataset (Huang et al. 2017). Compared to other CNN  
83 methods with equivalent or higher mAP, the Faster R-CNN architecture is less computationally  
84 costly and thus advantageous for large volumes of data. Further, the Faster R-CNN architecture  
85 has been tested in a wide range of applications, ranging from vehicle and pedestrian detection  
86 to malarial detection via cell classification (Ren et al. 2015; Hung et al. 2018) .

87 Here, we implement Faster R-CNN to identify and detect worms across a variety of different  
88 conditions without extensive user input. We find that after the initial training, the deep learning  
89 model quickly and accurately detects objects of interest. We demonstrate its flexibility across a  
90 variety of different recording platforms and imaging modalities. We also demonstrate its ability  
91 to detect worms across a variety of different ages (from L2 to death), showing its flexibility across  
92 different body sizes and movement levels, and illustrate how it can be used to extract useful  
93 behavioral metrics to give insights into biological questions, such as egg laying, development, and  
94 behavioral decline in aging. Finally, we provide a web-based pipeline ([https://github.com/lu-  
95 lab/frcnn-all-in-one](https://github.com/lu-lab/frcnn-all-in-one)) for testing our trained models with novel data and to enable other  
96 researchers to annotate and train their own object detection models with novel data and classes.

97

## 98 **RESULTS**

99 To illustrate the difficulty in identifying and tracking objects in complex conditions, we examined  
100 three common experimental set-ups. The first tracks an individual worm from the L2 larval stage  
101 to Day 1 of adulthood on an agar plate seeded with food (**Figure 1A**). During this period, the  
102 worm was free to roam throughout the field of view, and animals were imaged through early  
103 adulthood. This type of low-magnification imaging setup is common for long-term and high-  
104 throughput imaging (Swierczek et al. 2011; Mathew et al. 2012; Zheng et al. 2012; Buckingham  
105 et al. 2014; Perni et al. 2018), as well as lifespan imaging (Stroustrup et al. 2013) . For small L2  
106 animals, a major challenge in tracking is the small size of the individual (starting at around 360  
107  $\mu\text{m}$  in length) and differentiating it from the background despite the low contrast and low

108 magnification of the image. Tuning heuristics-based image processing tools to optimize for the  
109 small size and low contrast of young animals leads to further challenges as the worm grows  
110 (**Figure S1 A-E**). The contrast from background improves as the worm develops; however, other  
111 subtle changes in background (such as eggs or tracks formed on lawns) may be identified as  
112 animals when using heuristics tuned for young animals (**Figure S1 C-E**). These heuristics are also  
113 highly dependent on environmental and imaging conditions. In the case that changes in  
114 illumination or environment are an integral part of the experiment, this leads to an inability to  
115 process data without further tuning (**Figure S1 E**). Together, these challenges make processing  
116 developmental behavior data a labor-intensive task.

117 The second experimental system measures worm fecundity over time. An adult worm was  
118 allowed to roam across a seeded agar plate and freely lay eggs (**Figure 1C**). Due to the small size  
119 of eggs (~50  $\mu\text{m}$ ) (Riddle DL, Blumenthal T, Meyer BJ 1997), low magnification and contrast, and  
120 the tendency for eggs to be laid in clusters, it can be both time and labor intensive to manually  
121 count the number of eggs over time and mark their spatial location. Further, some studies may  
122 involve egg-laying behavior in different environments (e.g. on or off bacterial lawns) where  
123 imaging conditions and contrast pose significant problems in identifying these objects and  
124 distinguishing them from other objects in the field of view. In contrast to animals, the immobility  
125 of eggs also prevents the use of background subtraction as a useful tool. These practical  
126 constraints make it difficult to track fecundity and other egg-laying phenotypes at a large scale.

127 The third example is tracking the behavior and movement of individuals during the aging process.  
128 Worms were cultured within a microfluidic chamber array (**Figure 1D, top**) from the L4 stage to  
129 their death. Individuals were longitudinally monitored and their behavior was recorded  
130 intermittently throughout their lifespan under a variety of different food concentrations (**Figure**  
131 **1D, bottom rows**). While the size of the worm and the contrast are better than those for young  
132 animals during development, there are two inherent challenges. First, as before, the  
133 environment is heterogeneous - within the chamber there are often moving objects aside from  
134 the worm (such as debris or eggs laid by the individual), making it difficult to accurately identify  
135 and detect the location of the worm even in instances with high levels of movement. Second,  
136 there are low levels of movement as the worm ages and eventually dies, making it difficult to  
137 identify the worm through traditional image processing techniques that rely on movement.  
138 These challenges are cumbersome to address when using traditional image processing tools that  
139 require tuned user parameters. For instance, when the parameters are chosen for an individual  
140 video (**Figure S2 A-B, top row**), it fails to accurately identify and detect the location of worms of  
141 the same age and under the same environmental and imaging conditions (**Figure S2 A-B, bottom**  
142 **rows**). When the worm is in its reproductive period, the presence of lain eggs that cluster  
143 together in the chamber can cause misidentification and inaccurate segmentation of the worm  
144 (**Figure S2 A**). When the worm is aged and only performs small, subtle movements the algorithm  
145 often truncates or misidentifies the location of the worm entirely (**Figure S2 B**).

146 For both the on-plate and on-chip conditions, traditional detection and tracking methods are  
147 unable to robustly identify the location of the worm. While classic segmentation methods based  
148 on heuristics can provide posture information that CNN object detection methods cannot, the  
149 need to specifically tune parameters for a wide range of videos makes it unrealistic to deploy  
150 these methods at large scales in each of the demonstrated experiments. Thus, there is a need for  
151 a quick and generalizable method of identifying and tracking objects of interest in challenging  
152 imaging conditions such as these.

153 To address these challenges, we implemented Faster R-CNN, a deep learning network with high  
154 precision in object detection, including small objects. From an existing Faster R-CNN model pre-  
155 trained on the COCO image dataset, we tuned the model using our respective behavioral data  
156 sets (Lin et al. 2014; Abadi et al. 2015) . For each of the three different experimental conditions,  
157 we trained a separate Faster R-CNN model. For the condition with developing worms cultured on  
158 an agar plate we created the worms-on-plate (WoP) model. For the WoP model, we annotated  
159 worms with bounding boxes in 1,122 randomly chosen and representative images from a much  
160 larger dataset and trained the model with 1,008 of these, holding out the remainder as a test set  
161 to evaluate the model. To measure worm fecundity, we created the egg-finder model. We  
162 annotated eggs and worms in 127 images and used 114 of these to train the model, with the  
163 remainder used to for evaluation of model performance. Lastly, for the more specialized  
164 condition of worms cultured within the microfluidic chambers, we created the worms-in-  
165 chamber (WiCh) model. For the WiCh model, we annotated eggs and worms in 5,176 images,  
166 with 4,658 of these used to train and the remainder to evaluate the model.

167 When we qualitatively examined the bounding box output of these trained models, we found  
168 that many of the failure cases using traditional methods were resolved (**Figure 1, Figures S1-2**).  
169 In the WoP dataset, worms were identified accurately in both very low-contrast images when  
170 worms were very small as well as in much higher-contrast images later in life (**Figure 1A**). We also  
171 found that this model could detect worms in very different imaging conditions with which it was  
172 not trained (**Figure 1B, File S3**). This is highly significant as it indicates the model is much more  
173 generalizable compared to heuristic techniques and thus more widely usable in real applications.  
174 In the egg-finder dataset, we found that eggs were identified well despite their small size and  
175 tendency to cluster together (**Figure 1C**). Notably, when we applied the egg-finder model to  
176 publicly available videos from the Open Worm Movement Database, we were able to detect both  
177 worms and eggs (**File S1**). Finally, in the more specific WiCh dataset, worms were identified  
178 accurately, even in the most food-dense, low-contrast settings and at later ages where worm  
179 movement is reduced (**Figure 1D**). In addition, clusters of eggs could be accurately identified,  
180 making it possible to differentiate active worm movement from passive movement of the egg  
181 cluster (**Figure 1D**).

182 Next, we quantitatively evaluated our models to ensure their accuracy (**Table 1**). A common  
183 metric used in object detection is the average precision (AP), which uses the overlap between  
184 actual bounding boxes and those predicted by the model at varying confidence thresholds to

185 evaluate the model performance. An AP equal to unity would indicate perfect predictions. For  
186 the WoP model, we were able to obtain an average precision of 0.969. AP for the youngest  
187 animals (66 test images) was 1.0 with our test set, compared to the oldest animals (22 test  
188 images), for which false positives reduced the AP slightly to 0.876 (**Figure S3**), making the model  
189 robust across age without further tuning. For our egg-finder model, the worm AP was 0.932 and  
190 the egg AP was 0.74 (**Figure S3**). While the average precision for eggs is not as high as for the  
191 other objects we detected, we found that it was able to identify 79% of the eggs in our test set  
192 and that the sensitivity of the model for our test set was 0.84 (**Figure S3**). Conservative  
193 identification of eggs by the model likely stems from the size of eggs making the overlap threshold  
194 (intersection over union) of detections and ground truths particularly sensitive, as well as the  
195 intensity of the eggs being similar to other image features such as the tracks created by animal  
196 movement, and the occlusion of eggs by each other. In practice, we found this model worked  
197 well to identify egg-laying phenotypes in further experiments (see below, **Figure 3**), and was able  
198 to detect eggs in data collected by other labs (**File S1**). It also may be possible to improve the  
199 average precision by using more training data. For the WiCh model, we obtained an AP of 0.998.  
200 This model is also robust across different conditions within the dataset, ranging from different  
201 ages, contrast levels, and objects of interest (**Figure S3**), with the models detecting not just  
202 worms but also the laid eggs within the field of view (AP of 0.932).

203 In addition to the models being flexible across conditions without the need for additional  
204 parameter tuning, the inference time for each image is short (~131 ms/frame on our equipment).  
205 This is significant because in practice, these generalizable strategies can reduce the time and  
206 effort it takes to quantify new data. For instance, in cases with large sets of data under varied  
207 conditions, traditional hand annotation or the implementation of user-tuned parameters would  
208 require excessive amounts of time and manual labor. In contrast, deep learning enables users to  
209 analyze large behavioral datasets in a more efficient manner.

210 We next put the algorithm to a real use-case - monitoring egg-laying phenotypes of *C. elegans*.  
211 Egg-laying rate is indicative of health (Trent et al. 1983), evolutionary fitness (Duveau and Félix  
212 2012; Zhao et al. 2018; Anholt et al. 2020), and is also important in understanding the regulatory  
213 mechanisms of the reproductive circuit (Trent et al. 1983; Mendel et al. 1995; Ségalat et al. 1995;  
214 Chen et al. 2020). However, the small size (approximately 50  $\mu\text{m}$ ) and large number of eggs  
215 (about 300 per adult hermaphrodite) makes measuring fecundity a challenging task. Manually  
216 counting eggs is time-intensive, but it is often still the method of choice because existing  
217 automated methods for egg detection are very sensitive to imaging conditions, requiring high  
218 image uniformity and often high magnification (Geng et al. 2005; Jung et al. 2014; Chen et al.  
219 2020). Likely due to the challenging nature of the task, several popular software packages for  
220 worm behavior quantification do not include methods to track egg-laying (Swierczek et al. 2011;  
221 Wählby et al. 2012; Javer et al. 2018). Other egg-counting methods rely on specialized cytometry  
222 to count eggs as they are flushed from liquid culture (Sofela et al. 2018; Atakan et al. 2020).  
223 Another factor that makes counting eggs difficult is the burst-like timing of egg-laying events  
224 (Waggoner et al. 1998; Schafer 2005; Collins et al. 2016). Many egg-laying events in close

225 temporal proximity causes eggs to cluster, making identification of individual eggs challenging.  
226 Further, the bacterial lawn that adults feed on becomes highly textured as adults crawl on it,  
227 which makes identifying eggs and animals significantly more challenging for image thresholding  
228 methods. To determine whether the egg-finder model would resolve these issues, we applied it  
229 to count and locate eggs (**Figure 2**). We collected images of individual day 1 adult worms and the  
230 eggs they laid at two time points, 2 and 5 hours after transferring animals onto plates for  
231 individual culture. While we qualitatively found that our model did not successfully identify every  
232 egg, the agreement between manual egg counts and those from our model was significant  
233 (**Figure 2A & B**). Even when illumination was uneven across the field of view, when eggs were  
234 laid on the lawn, and when eggs clustered together, the model produced accurate results (as  
235 exemplified in **Figure 2A**). This robustness in the face of highly variable conditions indicates that  
236 this method is a much faster alternative to manual counting of eggs. This method is especially  
237 well suited for large datasets and movies where manual annotation of every frame would be  
238 prohibitively difficult or when imaging conditions like textured bacterial lawns prevent  
239 thresholding techniques from performing well.

240 Next, we showed that we can apply the algorithm to accurately estimate two egg-laying rates for  
241 each animal in early adulthood from images of individual animals' brood at two time points  
242 (**Figure 2C**). These results match previously reported egg-laying rates of about 4-10 eggs/hr  
243 (Waggoner et al. 1998). The distribution of egg-laying rates for the manual and Faster R-CNN  
244 model egg counts was statistically indistinguishable at both timepoints, whereas comparing the  
245 Faster R-CNN model egg count distributions and manual egg count distributions between  
246 timepoints showed a significant difference. We noted that egg-laying rates decreased over time,  
247 which we suspect is due to transferring animals from a crowded growth plate to individual plates.  
248 This change in the experienced levels of oxygen, carbon dioxide, and food may promote a higher  
249 egg-laying rate until the individuals habituate to the new environment and begin to deplete food  
250 (Trent et al. 1983; Schafer 2005; Fenk and De Bono 2015). The ability to detect this difference  
251 using the egg-finder model demonstrates that Faster R-CNN can be used to identify biologically  
252 relevant phenotypes in a less time-intensive way than manually counting eggs.

253 In addition to identifying a rate phenotype, we used the egg-finder model to identify a spatial  
254 phenotype using the food-sensing mutant *tph-1*. These animals are known to spend a greater  
255 fraction of time in a roaming state and are also slower to pause upon encountering food (Flavell  
256 et al. 2013; Entchev et al. 2015; Stern et al. 2017). Based on this and anecdotal evidence (Dhaval  
257 Patel, personal communication), we expected that *tph-1* animals would lay more eggs off of  
258 bacterial lawns compared to wild type animals. To examine whether this was the case, we  
259 defined an egg location preference score such that a greater number of eggs laid on the bacterial  
260 lawn would result in a positive preference score, while a negative preference score would  
261 indicate that a greater number of eggs were laid off the bacterial lawn. We found that the  
262 distribution of preference scores for WT and *tph-1* animals was consistent with *tph-1* animals  
263 having a lower preference for laying eggs on the bacterial lawn, and that the two distributions

264 were significantly different both when counted manually and when counted using the Faster R-  
265 CNN model (**Figure 2D**). This example demonstrates that the model can distinguish eggs on or off  
266 the lawn regardless of lighting, contrast, and despite the width of adult animal's tracks being  
267 almost the same size as an egg. Further, we applied the egg-finder Faster R-CNN model to movies  
268 from the publicly available Open Worm Movement Database and found that we were able to  
269 successfully detect both eggs and worms in these movies without additional training (**File S1**).  
270 Overall, the egg-finder model performed well across both datasets in different imaging  
271 conditions and was able to uncover the same egg-related phenotypes as a human annotator in  
272 our own dataset again suggesting that Faster R-CNN models can replace manual labor particularly  
273 for large-scale datasets and movies with complex imaging conditions.

274 In addition to quantifying aspects of behavior through endpoint snapshots, we reasoned that  
275 Faster R-CNN could also be used to track animals over time. Estimating animal linear and angular  
276 velocity is a useful indicator of the animals' behavior state (e.g. dwelling/ roaming) as well as  
277 potentially an indicator of health when observed over sufficiently long timescales (Hahm et al.  
278 2015; Zhang et al. 2016). Using the dynamic location of worm bounding boxes detected using our  
279 WoP model, we evaluated whether it was possible to obtain accurate movement measurements.  
280 We compared the centroids of detected bounding boxes obtained from our model to the  
281 centroids of hand-annotated postures at 5 series of time points over about 2 days of worm  
282 development (**Figure 3A-B**). Throughout the ~ 2 days of observation, the object detection model  
283 was able to accurately identify worms, with the smallest animals an average of 124 pixels (~0.12  
284 mm<sup>2</sup>) in area (**Figure 3A**, left column). This timescale includes development from late L2 stage  
285 through to adulthood. We found that the bounding box centroids detected were typically close  
286 (0.212 mm +/- 0.197 mean +/- standard deviation) to the centroids of the hand-annotated bounds  
287 of the worm, indicating that this method can provide accurate worm locations at discrete time  
288 points (**Figure 3A**, right column, **Figure S6 B-D**). To test whether we could also measure motion  
289 accurately with this method, we used time points a minute apart and calculated motion between  
290 the bounding box centroids and hand-annotated worm shape centroids at these time points. The  
291 difference between these two motion measurements was an average of 0.126mm +/- 0.083mm  
292 (mean +/- std) and motion trends were clearly replicated between the hand-annotated shape  
293 centroids and the bounding box centroids (**Figure 3B**, **Figure S6 C**). We further compared peak  
294 and mean velocity in our hand-annotated dataset to peak and mean velocity computed using the  
295 WoP Faster R-CNN model centroids. We found that both peak and mean velocities were very  
296 similar, with differences on the order of pixels in 5MP images (**Table S1**). Similarly, we found that  
297 we were able to very accurately recapitulate the linear and angular velocity and peak and mean  
298 velocities of a publicly available dataset using our WoP Faster R-CNN model (Stern et al. 2017)  
299 (**Figures S4 and S5**, **File S3**). Even without knowledge of the precise pixels that comprise the  
300 worm, the extents of the worm can be used as a rough measurement of movement and speed.

301 We next examined how this approach could be used to track behavior continuously over  
302 development. Behavior during development is individualistic and can affect long-term behavior



303 and neuropeptide signaling in *C. elegans* (Stern et al. 2017). The dual challenges of the small size  
304 and low contrast of young animals have previously imposed stringent hardware requirements to  
305 ensure high-quality images (e.g. at higher magnification), therefore limiting the scalability of  
306 long-term developmental experiments. In contrast, the WoP model can extract worm position  
307 despite low image quality and the extreme variation in the size and contrast of developing  
308 worms. We collected time-lapse images at 1-minute intervals of 10 animals over a 2-day period  
309 from late L2 stage to adulthood, and detected worm bounding boxes for each image (**Figure 3C**,  
310 **File S2**). The magnitude of motion increased over time, and likewise, we found that the size of  
311 the detected bounding box grew approximately 5-fold over time as the animals developed  
312 (**Figure 3C, Figure S6A**). We next examined whether our centroid data could be used to identify  
313 roaming and dwelling states, which are an indicator of satiety and which are influenced by  
314 neuromodulators. *C. elegans* spends the greater portion of its time moving at slower speeds  
315 while eating (dwelling) and a small portion of its time searching for other food sources (roaming)  
316 (Waggoner et al. 1998; Ben Arous et al. 2009; Flavell et al. 2013). We calculated the linear and  
317 angular velocity for each animal and found that while there was little separation in linear velocity  
318 between the two states, there was a striking split in angular velocity that was consistent with the  
319 roaming and dwelling state separation in other datasets at the same 1-minute sampling rate  
320 (**Figure 3D, Figure S7**). We found that by classifying the behavior state using an angular velocity  
321 threshold of 90 degrees we were able to accurately predict roaming and dwelling in a ground  
322 truth data set with the same sampling rate. We then used the same 90 degree threshold to  
323 identify roaming and dwelling states throughout animal development in our own data (**File S4**).  
324 Thus, this technique can enable researchers to infer high-level information about the animal's  
325 behavioral state from the limited information provided by bounding box identification.

326 Next we tested how well the model can be used to track motion in a realistic biological discovery  
327 context: examining behavioral decline in the aging process. Behavior and movement are common  
328 methods to gauge the health and physiological age of an individual (Golden et al. 2008; Hahm et  
329 al. 2015; Zhang et al. 2016; Churgin et al. 2017; Le et al. 2020). For these experiments, it can be  
330 challenging to accurately measure how the movement of individuals changes throughout their  
331 entire lifespan due to complex environmental conditions and the large scale of the data. As a  
332 specific example, we examined wild-type individuals cultured in a microfluidic device, allowing  
333 us to identify and track individuals throughout the entirety of their adult lifespan. Due to the size  
334 of each chamber (~1.5 mm in diameter), as the worm grows, the extent of movement becomes  
335 limited making common metrics (such as tracking the distance traveled by the centroid of the  
336 segmented worm) unable to clearly provide insights into the decline of movement over time. As  
337 a result, to gauge movement we examined the normalized sum of the difference in pixels across  
338 frames for segmented individuals (**Figure 4A**). As the worm ages and its movement declines, the  
339 difference across frames decreases as well for the overall population (**Figure 4B**). However,  
340 although this method provides useful insight into the behavioral decline of the individual, it can  
341 be difficult to accurately obtain the properly segmented worm in large datasets. This is due to  
342 issues with background contrast, the presence of eggs in the chamber, and the low mobility of

343 older worms. Furthermore, the process typically requires large amounts of manual parameter  
344 tuning (to account for the different sizes of worms as they age, changing levels of movement with  
345 age, and variation across the individuals) and substantial computational time to segment and  
346 extract features of interest. The need for manual tuning and intensive computational resources  
347 makes it difficult to scale this method for large sets of behavioral information.

348 Faster R-CNN can serve as a quick and accurate alternative to gauge behavioral decline with aging  
349 across a population. By tracking the bounding box locations of the worm detected by the WiCh  
350 model and measuring the IoU (intersection over union) of the detection bounding boxes across  
351 the video, we can get a rough metric of movement. Young, highly active worms have little to no  
352 bounding box intersection across frames, while older, slower moving worms have increasing  
353 levels of intersection across frames (**Figure 4C**). To examine how movement changed with time  
354 we examined a movement score ( $1 - \text{IoU}$ ), and observed individual decline in movement, as well  
355 as a population-level behavioral declines with age (**Figure 4D**). Not only were we able to view  
356 similar patterns of movement decline to that observed with segmented frames, we were able to  
357 do so on a larger scale with minimal processing time ( $\sim 131$  ms/frame).

358 Further, we wanted to examine whether this movement score could discern how perturbations  
359 influence decline in movement with age. Dietary restriction (DR) is an evolutionary conserved  
360 perturbation that has been shown to modulate aging (Mair et al. 2003; Colman et al. 2009; Greer  
361 and Brunet 2009). We examined the movement score of worms cultured under constant DR  
362 ( $\text{OD}_{600}2.5$ ) starting at Day 2 of adulthood and were able to demonstrate that the worms under  
363 lower food levels had a statistically significant difference in behavioral decline compared to  
364 worms cultured at higher food levels ( $\text{OD}_{600}10$ ), trends observed in a prior study (**Figure 4E**) (Le  
365 et al. 2020). In addition, to verify the performance of the model on the dataset, we also validated  
366 that the detected bounding boxes from the WiCh model were comparable to the bounding box  
367 of the hand annotated, segmented worms (**Figure S8**). This exercise demonstrates that motion  
368 quantitatively estimated by Faster R-CNN can be used as a quick metric to track and examine  
369 behavioral decline within an aging population.

370

## 371 **Discussion**

372 Processing big sets of behavior data remains a major challenge currently facing large-scale  
373 ethological studies. As a model organism, *C. elegans* is well-poised as a subject for large-scale  
374 investigation, but typical computer vision analysis pipelines may still be insufficient in complex  
375 imaging conditions, where the animal itself may change size, contrast with background, or where  
376 inhomogeneities in the environment lead to failure of heuristic models. Here we have shown that  
377 applying Faster R-CNN object detection models to identify, count, and track behaviors in  
378 challenging environments is a fast and flexible alternative to more traditional analysis methods.  
379 We first demonstrated this method's applicability in identifying eggs and determining egg-laying  
380 rates and spatial distribution of eggs. We were also able to show that this method was effective

381 in tracking movement of animals ranging from L2 stage through the end of life, providing high-  
382 level behavior state information as well as information relevant to animal health. This effectively  
383 includes most applications in behavioral and aging studies using *C. elegans*.

384 Compared to other conventional methods, we found this deep learning method to be  
385 significantly more generalizable across a variety of experimental conditions. It requires no  
386 specialized hardware or dedicated imaging set-up and, once trained, we found the Faster R-CNN  
387 models worked very well, even under conditions for which they had not been trained (**File S1,**  
388 **S3**). In comparison, other methods (including other machine-learning image classification tools  
389 like Ilastik (Berg et al. 2019)) needed additional manual tuning for even slightly different lighting  
390 conditions, differently sized animals, or changing contrast levels (**Figure S9**). While for small  
391 datasets, the time investment for annotating images and training the model may be high, for  
392 large datasets with imaging variability the high detection accuracy and elimination of video-by-  
393 video or frame-by-frame hand-tuning represents a significant gain. For datasets that require  
394 extensive human correction, the accuracy of manual annotation degrades unpredictably over  
395 time as attention wanes; in comparison, machine learning models are predictably biased based  
396 on the content of the training set. These advantages, combined with the high speed of processing  
397 with a GPU (on average 7.6 fps), makes the deep learning approach a very good alternative to  
398 more conventional methods.

399 For cases where the existing trained models (WoP, egg-finder, or WiCh) are unable to robustly  
400 detect objects of interest, we have also developed an easy-to-use web-based tool that enables  
401 users to annotate, retrain, and evaluate their dataset (accessible from [https://github.com/lu-](https://github.com/lu-lab/frcnn-all-in-one)  
402 [lab/frcnn-all-in-one](https://github.com/lu-lab/frcnn-all-in-one)). There is a low barrier-to-entry for use, with no dependence on paid,  
403 commercial software (such as MATLAB) and no requirement for downloading external programs.  
404 While we found that the Faster R-CNN architecture suited our accuracy and speed requirements,  
405 this pipeline can also be used to train models using other object detections architectures that  
406 achieve faster inferencing speeds with somewhat lower accuracy. Using the Faster R-CNN  
407 architecture with our pipeline, we found that training on as few as 10-20 annotated images for  
408 several hours provided very high-quality tracking results (**File S6**). This time investment will likely  
409 pay off for large-scale datasets and datasets where imaging conditions create challenges for  
410 classic thresholding methods.

411 We also showed that even without segmenting images as many traditional methods do, we were  
412 still able to extract information about animal and egg location, size, linear and angular velocity,  
413 and animal behavior state that could be used to identify biologically meaningful phenotypes.  
414 These simple methods have a lower computational cost than that of segmentation, and in cases  
415 where precise knowledge of posture is not necessary, this method provides a fast and  
416 environmentally robust estimation of relevant metrics. Additionally, there are related deep  
417 learning approaches that provide semantic segmentation, such as a Mask R-CNN model, which  
418 would enable extraction of posture information. The application of this model is a natural next  
419 step, although the annotation necessary to train such a model is significantly more intensive.

420 In addition to the ability to accurately identify and track animals quickly, the success of this deep  
421 learning method in extreme imaging conditions suggests that this method can be used to push  
422 the current limitations in quantifying animal behavior in ethologically relevant environments.  
423 Researchers face a trade-off between performing assays in naturalistic environments and the  
424 ability to extract more information from more uniform and controlled environments. Deep  
425 learning methods such as this one may provide us with a greater ability to extract the necessary  
426 information from richer environments with greater ethological relevance.

| <b>Model</b>        | <b>Category</b>  | <b>Average Precision (AP) @ threshold 0.5</b> | <b>Average Precision (AP) @ threshold 0.1</b> | <b>Average Precision (AP) @ confidence threshold 0.01, IoU threshold 0.3</b> |
|---------------------|------------------|-----------------------------------------------|-----------------------------------------------|------------------------------------------------------------------------------|
| <b>Development</b>  | Worms (all ages) | 0.969                                         | 0.969                                         | 0.969                                                                        |
| <b>Egg counting</b> | Eggs             | 0.398                                         | 0.430                                         | 0.740                                                                        |
| <b>Aging</b>        | Worms (all ages) | 0.998                                         | 1.00                                          | 1.00                                                                         |

427 **Table 1.** DETECTION RESULTS ACROSS DIFFERENT CONFIDENCE THRESHOLDS ON THE  
428 DEVELOPMENT, EGG LAYING, AND AGING DETECTION MODELS USING FASTER R-CNN.

429

430 **Author Contributions**

431 KB, KL, and HL conceptualized the work, KB and KL collected and analyzed data and developed  
432 models and generated figures, KB, KL, and HL wrote the paper, and HL supervised the work.

433 **Acknowledgments**

434 The authors are grateful to Shay Stern, Cori Bargmann, Yuehui Zhao, and Patrick McGrath for  
435 generously providing video data, to Dhaval Patel for advice regarding *tph-1* animals and to  
436 QueeLim Ch'ng for strains.

437 **Funding**

438 This study was funded by US NSF (1764406) and US NIH (R01AG056436, R01GM088333) grants  
439 to HL, US NIH F31 fellowship to KB (1F31GM123662) and US NSF GRF to KL (DGE-1650044).

440

441 **Conflict of Interest**

442 The authors declare that no conflicts of interest exist.

443 **Supplemental Material**

444 Supplemental figures and media can be found on figshare  
445 (<https://doi.org/10.6084/m9.figshare.13681675.v3>). Pre-trained models can also be found on  
446 figshare (<https://doi.org/10.6084/m9.figshare.13678705.v1>).

447

448 **Materials and Methods**

449 ***C. elegans* maintenance**

450 *C. elegans* strains were maintained under standard conditions at 20°C unless otherwise noted  
451 (Stiernagle 2006) . Strains used in this work include N2 and QL101[*tph-1(n4622) II*].

452 **Plate assays**

453 To prevent animals from leaving the microscope field of view (FoV), we prepared special plates.  
454 Palmitic acid has been demonstrated as an effective barrier for worms in behavior experiments  
455 (Fletcher and Kim 2017) . It is typically applied as a solution in ethanol to a standard plate and the  
456 ethanol is allowed to evaporate off. However, it is hard to deposit in a controlled way due to the  
457 palmitic acid solution wetting the agar. We used an ethanol-sterilized piece of PDMS as a negative  
458 to prevent a 10 mg/mL palmitic acid in ethanol solution from wetting the center of a 5cm NGM  
459 plate, allowing the ethanol to evaporate for at least 30 minutes before removing the PDMS with  
460 tweezers. These plates were subsequently seeded with 10 ul (developmental experiments) or 5

461 ul (egg-laying experiments) of OP50. Plates used in developmental experiments were incubated  
462 at room temperature for about 24 hours to allow a thin lawn to form and were stored at 4°C until  
463 an hour before use. For egg-laying experiments, plates were seeded approximately 2 hrs before  
464 transferring animals onto plates.

465 For developmental assays, adult animals were bleached to obtain eggs. Eggs were allowed to  
466 hatch and larvae allowed to reach L1 arrest by agitating eggs overnight in M9 buffer. L1s were  
467 then pipetted onto an unseeded NGM plate and single animals were pipetted onto the prepared  
468 seeded palmitic acid plates. These plates were then parafilm and incubated at 20°C until  
469 animals reached late L2 stage (20 hours after plating), when each plate was placed on a Raspberry  
470 Pi-based imaging system. The Raspberry Pi imaging system used a Raspberry Pi v3 Model B  
471 (Raspberry Pi Foundation) with official Raspberry Pi touchscreen (Raspberry Pi Foundation) and  
472 a Raspberry Pi Camera Module v2 (Raspberry Pi Foundation) with no additional lens to capture  
473 images at minute time intervals. Darkfield illumination was provided by an LED Matrix (Adafruit),  
474 with a center circle of LEDs dark and the surrounding matrix illuminating animals with red light.  
475 Developmental experiments lasted 44 hours, at which point worms have typically reached sexual  
476 maturity and plates were removed from imaging systems.

477 For egg-laying assays, gravid day 1 adults animals were picked onto prepared palmitic acid plates  
478 and plates were imaged at 2 and 5 hours at 1.6x on a stereomicroscope (Leica M165 FC) using a  
479 1.3 MP CMOS camera (Thorlabs DCC1645C) with a 0.5x coupler.

#### 480 ***C. elegans* on-chip culture**

481 Synchronized L4-stage wildtype animals were loaded into a worm chamber array microfluidic  
482 device. Microfluidic devices were fabricated from polydimethylsiloxane using standard soft  
483 lithography techniques and sterilized by autoclaving.

484 Worms were cultured at 20°C in *E. coli* (HB101) spiked with Pluronic F-127 (0.005%), carbenicillin  
485 (50µg/ml), and kanamycin (50µg/ml) to prevent the risk of bacterial aggregation and  
486 contamination during long-term culture. The bacteria was at a concentration of OD<sub>600</sub> 10 to  
487 prevent any harmful effects of dietary restriction on the developmental process. The bacteria  
488 also contained 5uM of C22, which interrupts eggshell formation and results in non-viable  
489 progeny. At Day 2 of adulthood, worms were then shifted to 25°C and to the desired food level.  
490 Individuals shown in Figure 4 were maintained at OD<sub>600</sub> 10 unless otherwise stated. Individuals  
491 in Figure 1 were cultured at OD<sub>600</sub>10 and OD<sub>600</sub>2.5. We used an average flow rate of  
492 approximately 15µL/min across all conditions. See prior work for more details. (Le et al. 2020)

#### 493 **Training Faster R-CNN network**

494 For the egg detection and aging model, we used TensorFlow GPU (v 1.14) to train the model. For  
495 the developmental tracking model, we used TensorFlow CPU (v 1.14). For all models except the  
496 model trained using the web-based pipeline we used the pre-trained ‘Faster\_rcnn\_inception\_v2’  
497 model from the Tensorflow 1 model zoo  
498 ([https://github.com/tensorflow/models/blob/master/research/object\\_detection/g3doc/tf1\\_de](https://github.com/tensorflow/models/blob/master/research/object_detection/g3doc/tf1_detection_zoo.md)  
499 [tection\\_zoo.md](https://github.com/tensorflow/models/blob/master/research/object_detection/g3doc/tf1_detection_zoo.md)) and fine-tuned it with our data sets of interest. We trained the models and  
500 processed the images on a system with an Intel(R) Xeon(R) CPU E5-1620 v4 processor and a  
501 NVIDIA Quadro M4000 GPU.

502

503 For the egg detection model, images were taken of a mixed population of wild-type worms on a  
504 seeded plate at 1.6x magnification on a stereomicroscope (Leica M165 FC) using a 1.3 MP CMOS  
505 camera (Thorlabs DCC1645C) with a 0.5x coupler. We manually annotated 127 images of worms  
506 and eggs using the labellmg Python package. Images were randomly split into training and testing  
507 sets using a rough 90/10 split (114 images for training, 13 test images).

508 For the developmental tracking model, images were taken as described for plate developmental  
509 assays above. 1,122 images were randomly selected from a large set of developmental imaging  
510 data (> 10,000 images taken on 8 different imaging setups) and annotated using the labellmg  
511 Python package. This annotated image set was divided into 1,008 images for training and 114  
512 images for testing, roughly a 90/10 split. No images used in training or testing overlap with image  
513 data evaluated in Figure 4.

514 For the aging model, videos were taken at an acquisition rate of 14 fps using a 1.3 Megapixel  
515 monochrome CMOS camera (Thorlabs DCC1545M camera) coupled with a 10X close focus zoom  
516 lens (Edmund #54-363). Each video was 10 seconds in length. Illumination was provided by a set  
517 of concentric red LED rings (Super Bright LEDs 60 and 80mm LED Halo Headlight Accent Lights) to  
518 reduce the amount of blue light exposed to the worm. Videos were sampled evenly throughout  
519 the lifespan of individuals in food levels of OD<sub>600</sub>10 and OD<sub>600</sub>2.5. We manually annotated 5,176  
520 frames of worms and, if present, eggs using the labellmg Python package. Images were randomly  
521 split into training and testing sets using a rough 90/10 split (4658 images for training, 518 test  
522 images).

523 For the model trained with our web-based pipeline, we annotated 14 frames total and used 12  
524 frames to train a Tensorflow 2 Faster R-CNN model pre-trained with the COCO image dataset for  
525 2 hours. We used the resulting model to perform the detections in Supplemental File 6.

#### 526 Faster R-CNN model characterization

527 For each of our annotated datasets, we evaluated how well our model performed by calculating  
528 precision and recall as well as average precision. Precision is a measure of the false positive rate,  
529 as calculated by  $recision = \frac{TP}{TP+FP}$ , where TP is the number of true positives and FP is the  
530 number of false positives. Recall is a measure of the false negative rate, as calculated by  $ecall =$

531  $\frac{TP}{TP+FN}$ , where FN is the number of false negatives. Average precision is the integral of the  
532 precision recall curve for a set of images that have ground truth bounding box annotations as  
533 well as model predictions. To determine whether detections by the models were true positives,  
534 false positives, or false negatives, we used a measure of the overlap of detections and ground  
535 truth known as intersection over union (IoU), calculated as  $IoU = \frac{|GT \cap P|}{|GT \cup P|}$ , where GT is the  
536 bounding box of the ground truth and P is the bounding box of the prediction. An  $IoU \geq 0.5$  is  
537 counted as a true positive and an  $IoU < 0.5$  as a false positive for our worm detections, with the  
538 IoU threshold lowered to 0.3 for egg detections in our egg-finder model. A false negative is  
539 counted when a ground truth annotation has no overlap with a detection by the model. Once all  
540 images with ground truth annotations are evaluated in this way, the maximum precision at each  
541 recall level is used to interpolate between points of the precision-recall plot.

542 The AP, recall, and precision for the egg-finder Faster R-CNN model was evaluated using a score  
543 threshold of 0.01. The AP, recall and precision for the WoP Faster R-CNN model and the aging  
544 model was evaluated using a score threshold of 0.5. Mask annotation and centroid computation  
545 for ground-truth movement comparisons of data in Figure 3 was collected using MATLAB.

546

#### 547 Evaluation of egg-laying phenotypes

548 Images of individually cultured animals were collected at 2 hrs after transfer onto individual  
549 plates and again at 5 hrs after transfer. For each image, a human curator manually counted eggs  
550 and identified them as being on or off the bacterial lawn. The Faster R-CNN model was also used  
551 to detect eggs in each image at a confidence threshold above 0.01, and eggs were manually  
552 identified as being on or off the bacterial lawn. We used these detections to overlay bounding  
553 boxes on each image and manually classified each detection as on or off the bacterial lawn. As  
554 the arena where the worm was able to roam was larger than the microscope field of view, images  
555 were tiled to ensure all eggs laid by each individual were captured. In cases where images  
556 overlapped with one another, double-counted eggs were subtracted from the overall count. The  
557 egg-laying preference score was calculated as follows:  $preference\ ratio = \frac{eggs_{on} - eggs_{off}}{eggs_{on} + eggs_{off}}$ .

#### 558 Evaluation of behavioral decline in aging

559 Images of worms were segmented through hand annotations using Ilastik. To calculate the pixel  
560 difference as the worms age we used  $\frac{\sum |img1 - img2|}{(img1 + img2)/2}$  where img1 was the initial segmented frame  
561 of the video and img2 was the final segmented frame of the video. The IoU of the bounding boxes  
562 were calculated using the built-in MATLAB function `bboxOverlapRatio`. The 1-IoU metric was  
563 found by looking at the overlap between the bounding box found in the first frame and the  
564 bounding box found in the last frame of the video.



565

566 **Data Availability**

567 All raw and annotated datasets and trained models are available as supplemental material via  
568 figshare (<https://doi.org/10.6084/m9.figshare.13678705.v1>).

## 569 Figure Legends

### 570 Figure 1. Deep learning can be used to detect objects in a variety of complex environments

- 571 A. Tracking an individual worm throughout its developmental period (from L2 to Day 1  
572 adulthood). (*left*) Images of the plate over time. Scale bar is 5mm. The red box is the  
573 Faster R-CNN detection of the tracked worm. (*right*) Zoomed in image of the worm  
574 detected by the WoP Faster R-CNN model. Scale bar is 0.5mm.
- 575 B. The WoP model applied in a different experimental set-up (adult worms in a microfluidic  
576 pillar array chamber). Worms detected by the WoP Faster R-CNN model are marked  
577 with red bounding boxes. Scale bar is 3mm.
- 578 C. An egg-laying adult on an agar plate, with detected eggs boxed in blue and detected  
579 worm boxed in red. All detections made with egg-finder Faster R-CNN model. Scale bar  
580 is 1mm. (*right*) Zoomed in image of a cluster of eggs detected by the model.
- 581 D. Tracking worms through their adult lifespan. (*top*) Microfluidic chamber array that  
582 cultures individual worms within each chamber (white arrows indicate chambers with  
583 single worms). White scale bar is 1.5mm. (*bottom*) Zoomed in images of individual  
584 worms under different food levels across the entirety of their adult lifespan. Worms  
585 detected by the WiCh Faster R-CNN model are boxed in red. Egg clusters detected by  
586 the WiCh Faster R-CNN model are boxed in blue. Scale bar is 0.5 mm.

### 587 Figure 2. Automated egg detection using Faster R-CNN

- 588 A. Representative image from egg-finder dataset. Blue boxes overlaid on the right inset  
589 images indicate egg detections using the egg-finder Faster R-CNN model at the  
590 confidence score threshold of 0.01. Scale bar is 1mm.
- 591 B. Agreement between manual egg count and egg-finder Faster R-CNN model egg count.  
592 Eggs laid by individual animals were counted manually and using the Faster R-CNN  
593 model with a confidence score threshold of 0.01. The agreement between these two  
594 counts was measured at two time points for n=29 individual animals. Distributions were  
595 compared using the Kolmogorov-Smirnov 2-sample test and found to be not  
596 significantly different (KS statistic is 0.155, p value is 0.491).
- 597 C. Egg-laying rate distribution for 29 animals at 2 time points. Horizontal bars within each  
598 distribution represent egg counts for individual animals. Distributions were compared  
599 using the Kolmogorov-Smirnov 2-sample test. The egg-laying rate counted manually at  
600 timepoint one was significantly different from the egg-laying rate counted manually at  
601 timepoint two (KS statistic is 0.448, p value is 0.0053). The egg-laying rate counted using  
602 the egg-finder Faster R-CNN model with a confidence threshold of 0.01 at timepoint one  
603 was significantly different from the egg-laying rate counted using the egg-finder Faster  
604 R-CNN model with the same threshold at timepoint two (KS statistic is 0.448, p value is  
605 0.0053). For each timepoint, the Faster R-CNN egg-laying rate distribution was  
606 compared to the manually counted distribution, and for both timepoints, the KS test  
607 statistic was determined to be 0.2069 with a p value of 0.5141.

608 D. Egg-laying preference for N2 (n= 16) and *tph-1* (n=13) animals. Horizontal bars within  
609 each distribution represent egg counts for individual animals. Positive scores indicate a  
610 higher propensity to lay eggs on the lawn compared to off the lawn. Negative scores  
611 indicate a higher propensity to lay eggs off the lawn (see Methods for calculation  
612 formula). Distributions were compared using the Kolmogorov-Smirnov 2-sample test. N2  
613 vs. *tph-1* distributions were different at a significant level for both manual counts (KS  
614 stat is 0.473, p-value of 0.0018) and egg-finder Faster R-CNN model counts (KS stat is  
615 0.459, p-value is 0.0028).

### 616 **Figure 3. Tracking behavior in development**

617 A. A single N2 animal tracked throughout development at 5 example time points. At left,  
618 the full-size image is overlaid with a red box highlighting the worm location for each  
619 timepoint. At right, the boxed portion of the image is overlaid with the manual  
620 annotation at the example timepoint (blue) and five minutes later (yellow), as well as  
621 the centerpoint of the WoP Faster R-CNN model's detected bounding box at the  
622 example timepoint (purple) and five minutes later (orange).

623 B. Heatmap comparing distance travelled by worms calculated from manual annotations  
624 and WoP Faster R-CNN model detections. For each timepoint in A and the subsequent  
625 five minutes, the distance travelled by the worm is calculated from manually segmented  
626 animals and from the WoP Faster R-CNN detections. The manual distance is calculated  
627 from the Euclidean distance travelled at the centroid of the segmented animal for each  
628 pair of time points, while the Faster R-CNN distance travelled is calculated from the  
629 Euclidean distance between the centroid of WoP Faster R-CNN bounding boxes for each  
630 pair of time points.

631 C. Heatmap of centroid movement measured using the Faster R-CNN model for 10  
632 individuals over the course of development from late L2 stage through adulthood.

633 D. Histogram of Faster R-CNN derived movement speeds for the example animal in A and  
634 B.

### 635 **Figure 4. Tracking behavioral decline in aging**

636 A. (top) Representative image of movement as the worm ages. The posture at the  
637 beginning of the video is shown in blue. The posture at the end of the video is shown in  
638 yellow. (bottom) Absolute difference image of the frames shown on the left. Pixel  
639 change values are the sum of the absolute difference image normalized by the average  
640 worm size in the video.

641 B. (top) Heatmap of individual behavior decline (via pixel changes) over time (n = 15).  
642 (bottom) Average pixel change values over time from L4 to Day 15 of adulthood. Error is  
643 plotted as SEM.

644 C. Representative image of the bounding boxes obtained using Faster R-CNN as the worm  
645 ages. The box found at the beginning of the video is shown in blue. The box found at the  
646 end of the video is shown in yellow. The IoU of the two boxes is shaded.

- 647 D. (top) Heatmap of individual movement ( $1 - \text{IoU}$ ) from L4 to Day 15 of adulthood ( $n =$   
648 31). Individuals are cultured in  $\text{OD}_{600}10$ . (bottom) Average movement decline over time.  
649 Error is plotted as SEM.  
650 E. Average movement decline over time for individuals cultured in high levels of food  
651 ( $\text{OD}_{600}10$  in blue) and individuals cultured in low levels of food ( $\text{OD}_{600}2.5$  in red). Error is  
652 plotted as SEM. Movement for  $\text{OD}_{600}10$  and  $\text{OD}_{600}2.5$  is significantly different via  
653 Kolmogorov-Smirnov 2-sample test ( $p = 0.003$ ).

654

## 655 **Supplemental Figure Legends**

### 656 **Figure S1. Limitations of traditional image processing techniques in developmental** 657 **monitoring**

- 658 A. Detection of animals throughout development using the trained WoP Faster R-CNN  
659 model or a common tool that uses traditional segmentation (Tierpsy Tracker). Tierpsy  
660 Tracker parameters were manually tuned to detect the animal in the example image in  
661 A, and not re-tuned for analyzing the same animal at later timepoints in B-E. Successful  
662 segmentation of the worm by Tierpsy Tracker is denoted by a white arrow, with non-  
663 worm segmentations marked by red arrows (*middle column*). Worm detections using  
664 the WoP Faster R-CNN model are bounded by a red box (*left column*). All worm  
665 detections shown reached a confidence threshold of 0.99. The animal in A is detected  
666 by both the WoP model and Tierpsy Tracker, but other non-worm objects are identified  
667 based on the optimized Tierpsy Tracker segmentation.  
668 B. The same animal as in A at a later timepoint. The animal is identified using the WoP  
669 model, but not identified by Tierpsy Tracker.  
670 C. As contrast improves, the same animal is detected by both Tierpsy Tracker and the  
671 WoP model, but the segmentation parameters as optimized for small, low-contrast  
672 animals also pick up non-worm objects.  
673 D. Once the animal becomes a gravid adult, the animal is identified by both Tierpsy  
674 Tracker and the WoP model, but eggs and tracks in the bacterial lawn increase the  
675 number of non-worm segmentations by Tierpsy Tracker.  
676 E. Illumination changes increases the number of non-worm segmentations by Tierpsy  
677 Tracker, while the WoP model is still able to identify the animal and no other non-  
678 worm objects.

### 679 **Figure S2. Limitations of traditional image processing techniques in aging populations**

- 680 A. Detection of a young worm using traditional techniques (Tierpsy Tracker) or the trained  
681 WiCh Faster R-CNN model (*top row*) Successful detection of a worm via Tierpsy Tracker.  
682 Parameters for traditional techniques were manually tuned for this specific video.  
683 (*bottom rows*) Detection of worms (under the same age and environmental condition)  
684 using the same parameters as before. Detection errors are highlighted by red arrows.  
685 Red boxes show detection location via WiCh Faster R-CNN model.

- 686 B. Detection of an old, slow moving worm using traditional techniques (Tierpsy Tracker) or  
687 the trained WiCh Faster R-CNN model (*top row*) Successful detection of a worm.  
688 Parameters for traditional techniques were manually tuned for this specific video.  
689 (*bottom rows*) Detection of worms (under the same age and environmental condition)  
690 using the same parameters as before. Errors and misidentification are highlighted by red  
691 arrows. Red boxes show detection location via WiCh Faster R-CNN model.

692 **Figure S3. Precision-recall curves for the detection models**

- 693 C. Precision-recall curves for worm detection in the WoP model with confidence threshold  
694 of 0.5. Precision recall curve for all worms (left), L2-L3 stage animals (middle), and adult  
695 animals (right).  
696 D. Precision-recall curve for the worm detection (left) and egg detection (right) in the egg-  
697 finder model with confidence threshold of 0.01. The intersection over union used to  
698 determine true positive detections for eggs was 0.3, compared to 0.5 for worms.  
699 E. Precision-recall curve for the overall worm detection (left) and egg detection (right) in  
700 the WiCh model with confidence threshold of 0.5 (*top row*). Precision-recall curves for  
701 the worm at varying stages in the lifespan with confidence threshold of 0.5 (*middle*  
702 *row*), and across different food levels/contrasts with confidence threshold of 0.5  
703 (*bottom row*).

704 **Figure S4. Accurate centroid tracking in other datasets**

- 705 A. Comparison of X centroid coordinates from Stern *et al.* to Faster R-CNN WoP model  
706 detections of the same data.  
707 B. Comparison of Y centroid coordinates from Stern *et al.* to Faster R-CNN WoP model  
708 detections of the same data.

709 **Figure S5. Accurate linear and angular velocity analysis with other datasets**

- 710 A. Comparison of binned angular velocity over time from Stern *et al.* and Faster R-CNN  
711 WoP detections of the same data. Data was binned by first smoothing angular velocities  
712 using a 10s moving average window (as in Stern *et al.*), then thresholding the data into  
713 low and high angular velocities. The angular velocity values represent the average  
714 angular velocity of the low and high angular velocity data for each data set  
715 independently.  
716 B. Linear velocity of both datasets vs. time. Linear velocity was calculated in the same way  
717 from both datasets, then smoothed with a moving average window of 10s, and finally by  
718 removing outliers.  
719 C. Scatterplot comparing Faster R-CNN WoP centroid velocities to Stern *et al.* ground truth  
720 velocities.

721 **Figure S6. Accuracy of tracking in development**

- 722 A. Change of bounding box size over time using WoP Faster R-CNN for animal depicted in  
723 4A. Smoothed using a moving window average over 10 time points (10 minutes). Where  
724 no animal is detected, line is not connected.

- 725 B. Density histogram of distances between box centroid as detected by WoP Faster R-CNN  
726 model and centroid of annotated worm shape for animal in 4A (n=30 time points).  
727 C. Density histogram of difference between movement calculated from annotations and  
728 movement calculated from WoP Faster R-CNN model for animal in 4A (n=25 time  
729 points).  
730 D. Centroid movement as calculated by the WoP Faster R-CNN model vs. centroid  
731 movement as calculated from manually segmented animals for animal in 4A (n=25)

732 **Figure S7. Accurate classification of roaming and dwelling at reduced sampling frequency**

- 733 A. Linear vs. angular velocity probability plot, calculated as described in Stern *et al.* with  
734 centroid data from Stern *et al.* Black dashed line shows split used to classify roaming vs.  
735 dwelling states.  
736 B. Linear vs. angular velocity probability plot, calculating angular velocity by using the Stern  
737 *et al.* centroids at the current time as well as the centroid one minute in the past and  
738 one minute into the future. Black dashed line shows split at 90 degrees/min angular  
739 velocity used to classify roaming/ dwelling states with 79% accuracy based on ground  
740 truth classification in (A).

741 **Figure S8. Accurate detection of worms using the WiCh model**

742 Histogram of IoU values for bounding boxes detected by the WiCh Faster R-CNN model  
743 compared to bounding boxes of hand annotated, segmented worms of the same frame. (n =  
744 2550 frames).

745 **Figure S9. Limitations with existing machine learning based segmentation tools**

- 746 A. Representative example frames of issues with segmentation using Ilastik within the  
747 same video. Even after training at least 50 frames (including a frame from the same  
748 video) the classification predictions and subsequent segmentations truncate the worm.  
749 Blue denotes background, yellow marks the worm, and red marks the egg objects.  
750 B. Representative example frames of issues with segmentation using Ilastik across similar  
751 videos. All frames were taken under the same imaging condition. (top) Prediction of  
752 pixel classification using the trained model. The model was trained with at least 50  
753 images prior. Blue denotes background, yellow marks the worm, and red marks the egg  
754 objects. (bottom) Segmentation of objects based on the predictions. Note the  
755 truncation of worms and the misclassification of eggs as worms.

756

757 **Supplemental Files**

- 758 1. Video from the Open Worm Movement Database  
759 ([https://www.youtube.com/channel/UCx36wu\\_Hh0sGvPaCkAMHrMg](https://www.youtube.com/channel/UCx36wu_Hh0sGvPaCkAMHrMg)) with egg and

- 760 worm detections using the egg-finder Faster R-CNN detection model overlaid in blue  
761 (eggs) and red (worms).
- 762 2. Time-lapse video of a developing N2 animal (the same animal as in Figure 4A-B) imaged  
763 at one-minute intervals on an agarose plate. The video speed is such that 1s is  
764 equivalent to 30 minutes of images. The left half of the frame consists of the original  
765 images, and the right half is the original image with a green box indicating the WoP  
766 Faster R-CNN detection overlaid.
  - 767 3. Video from (Stern et al. 2017) with worm detections using WoP Faster R-CNN model  
768 overlaid in red (x5 speed).
  - 769 4. Time-lapse video of a developing N2 animal (the same animal as in Figure 4A-B) with  
770 behavioral state identified for each timepoint based on the angular velocity. If the  
771 location of the worm could not be identified in any set of three consecutive frames, the  
772 frame is marked with 'No data'.
  - 773 5. Time-lapse video of an aging worm every other day from L4 to Day 16 within the  
774 microfluidic device at food level  $OD_{600}10$ . The video is at 2x speed.
  - 775 6. Time-lapse video of a plate with adult animals overlaid with worm detections in red  
776 from the Faster R-CNN model trained using our web-based pipeline. The model was  
777 trained for ~ 2 hours on 12 annotated images.
- 778  
779  
780

## 781 **References**

- 782 Abadi M, Agarwal A, Barham P, Brevdo E, Chen Z, Citro C, Corrado GS, Davis A, Dean J, Devin M, et al.  
783 2015. TensorFlow: Large-scale machine learning on heterogeneous systems. tensorflow.org.
- 784 Anderson DJ, Perona P. 2014. Toward a science of computational ethology. *Neuron*. 84(1):18–31.  
785 doi:10.1016/j.neuron.2014.09.005.
- 786 Anholt RRH, O’Grady P, Wolfner MF, Harbison ST. 2020. Evolution of reproductive behavior. *Genetics*.  
787 214(1):49–73. doi:10.1534/genetics.119.302263. [accessed 2021 Jan 27].  
788 <https://doi.org/10.1534/genetics.119.302263>.
- 789 Ben Arous J, Laffont S, Chatenay D. 2009. Molecular and Sensory Basis of a Food Related Two-State  
790 Behavior in *C. elegans*. Brezina V, editor. *PLoS One*. 4(10):e7584. doi:10.1371/journal.pone.0007584.  
791 [accessed 2021 Jan 12]. <https://dx.plos.org/10.1371/journal.pone.0007584>.
- 792 Atakan HB, Ayhan F, Gijs MAM. 2020. PDMS filter structures for size-dependent larval sorting and on-  
793 chip egg extraction of: *C. elegans*. *Lab Chip*. 20(1):155–167. doi:10.1039/c9lc00949c. [accessed 2021 Jan  
794 26]. <https://pubs.rsc.org/en/content/articlehtml/2020/lc/c9lc00949c>.
- 795 Berg S, Kutra D, Kroeger T, Straehle CN, Kausler BX, Haubold C, Schiegg M, Ales J, Beier T, Rudy M, et al.  
796 2019. ilastik: interactive machine learning for (bio)image analysis. *Nat Methods*. 16(12):1226–1232.  
797 doi:10.1038/s41592-019-0582-9. [accessed 2021 May 4]. <https://doi.org/10.1038/s41592-019-0582-9>.
- 798 Brown AEX, De Bivort B. 2018. Ethology as a physical science. *Nat Phys*. 14(7):653–657.  
799 doi:10.1038/s41567-018-0093-0. [accessed 2021 Jan 13]. <https://doi.org/10.1038/s41567-018-0093-0>.
- 800 Brown AEX, Gomez-Marin A, Stephens GJ. 2016. Hierarchical compression of *Caenorhabditis elegans*  
801 locomotion reveals phenotypic differences in the organization of behaviour. *J R Soc Interface*.  
802 doi:10.1098/rsif.2016.0466. [accessed 2017 Feb 7]. <http://dx.doi.org/10.1098/rsif.2016.0466>.
- 803 Brown AEX, Yemini EI, Grundy LJ, Jucikas T, Schafer WR. 2013. A dictionary of behavioral motifs reveals  
804 clusters of genes affecting *Caenorhabditis elegans* locomotion. *Proc Natl Acad Sci U S A*. 110(2):791–6.  
805 doi:10.1073/pnas.1211447110. [accessed 2017 Mar 3].  
806 <http://www.ncbi.nlm.nih.gov/pubmed/23267063>.
- 807 Buckingham SD, Partridge FA, Sattelle DB. 2014. Automated, high-throughput, motility analysis in  
808 *Caenorhabditis elegans* and parasitic nematodes: Applications in the search for new anthelmintics. *Int J*  
809 *Parasitol Drugs Drug Resist*. 4(3):226–232. doi:10.1016/j.ijpddr.2014.10.004.
- 810 Chalfie M, Sulston JE, White JG, Southgate E, Thomson JN, And +, Brenners S. 1985. The Neural Circuit  
811 for Touch Sensitivity in *Caenorhabditis elegans*’.
- 812 Chen YC, Seyedsayamdost MR, Ringstad N. 2020. A microbial metabolite synergizes with endogenous  
813 serotonin to trigger *C. elegans* reproductive behavior. *Proc Natl Acad Sci U S A*. 117(48):30589–30598.  
814 doi:10.1073/pnas.2017918117. [accessed 2021 Jan 12]. <https://www.pnas.org/content/117/48/30589>.
- 815 Chung K, Zhan M, Srinivasan J, Sternberg PW, Gong E, Schroeder FC, Lu H. 2011. Microfluidic chamber  
816 arrays for whole-organism behavior-based chemical screening. *Lab Chip*. 11(21):3689–3697.  
817 doi:10.1039/c1lc20400a.
- 818 Churgin MA, Jung S-K, Yu C-C, Chen X, Raizen DM, Fang-Yen C. 2017. Longitudinal imaging of  
819 *Caenorhabditis elegans* in a microfabricated device reveals variation in behavioral decline during aging.



- 820 Elife. 6:e26652. doi:10.7554/eLife.26652. [accessed 2017 Oct 9].  
821 <http://elifesciences.org/lookup/doi/10.7554/eLife.26652>.
- 822 Collins KM, Bode A, Fernandez RW, Tanis JE, Brewer JC, Creamer MS, Koelle MR. 2016. Activity of the *C. elegans* egg-laying behavior circuit is controlled by competing activation and feedback inhibition. Elife.  
823 5(NOVEMBER2016). doi:10.7554/eLife.21126.  
824
- 825 Colman RJ, Anderson RM, Johnson SC, Kastman EK, Kosmatka KJ, Beasley TM, Allison DB, Cruzen C,  
826 Simmons HA, Kemnitz JW, et al. 2009. Caloric restriction delays disease onset and mortality in rhesus  
827 monkeys. Science (80- ). 325(5937):201–204. doi:10.1126/science.1173635.
- 828 Duvéau F, Félix MA. 2012. Role of pleiotropy in the evolution of a cryptic developmental variation in  
829 *Caenorhabditis elegans*. PLoS Biol. 10(1). doi:10.1371/journal.pbio.1001230.
- 830 Entchev E V., Patel DS, Zhan M, Steele AJ, Lu H, Chng QL. 2015. A gene-expression-based neural code for  
831 food abundance that modulates lifespan. Elife. 4(MAY). doi:10.7554/eLife.06259.
- 832 Fenk LA, De Bono M. 2015. Environmental CO<sub>2</sub> inhibits *Caenorhabditis elegans* egg-laying by modulating  
833 olfactory neurons and evokes widespread changes in neural activity. Proc Natl Acad Sci U S A.  
834 112(27):E3525–E3534. doi:10.1073/pnas.1423808112. [accessed 2021 Jan 26].  
835 [www.pnas.org/cgi/doi/10.1073/pnas.1423808112](http://www.pnas.org/cgi/doi/10.1073/pnas.1423808112).
- 836 Flavell SW, Pokala N, Macosko EZ, Albrecht DR, Larsch J, Bargmann CI. 2013. Serotonin and the  
837 neuropeptide PDF initiate and extend opposing behavioral states in *C. Elegans*. Cell. 154(5):1023–1035.  
838 doi:10.1016/j.cell.2013.08.001.
- 839 Fletcher M, Kim DH. 2017. Age-Dependent Neuroendocrine Signaling from Sensory Neurons Modulates  
840 the Effect of Dietary Restriction on Longevity of *Caenorhabditis elegans*. Ashrafi K, editor. PLOS Genet.  
841 13(1):e1006544. doi:10.1371/journal.pgen.1006544. [accessed 2020 Feb 11].  
842 <https://dx.plos.org/10.1371/journal.pgen.1006544>.
- 843 Geng W, Cosman P, Palm M, Schafer WR. 2005. *Caenorhabditis elegans* egg-laying detection and  
844 behavior study using image analysis. EURASIP J Appl Signal Processing. 2005(14):2229–2240.  
845 doi:10.1155/ASP.2005.2229. [accessed 2021 Jan 26]. <https://asp->  
846 [eurasipjournals.springeropen.com/articles/10.1155/ASP.2005.2229](http://eurasipjournals.springeropen.com/articles/10.1155/ASP.2005.2229).
- 847 Golden TR, Hubbard A, Dando C, Herren MA, Melov S. 2008. Age-related behaviors have distinct  
848 transcriptional profiles in *Caenorhabditis elegans*. Aging Cell. 7(6):850–865. doi:10.1111/j.1474-  
849 9726.2008.00433.x. [accessed 2020 Aug 28]. <http://doi.wiley.com/10.1111/j.1474-9726.2008.00433.x>.
- 850 Gray JM, Hill JJ, Bargmann CI. 2005. A circuit for navigation in *Caenorhabditis elegans*. Proc Natl Acad Sci  
851 U S A. 102(9):3184–3191. doi:10.1073/pnas.0409009101. [accessed 2021 May 2].  
852 [www.pnas.org/cgi/doi/10.1073/pnas.0409009101](http://www.pnas.org/cgi/doi/10.1073/pnas.0409009101).
- 853 Greer EL, Brunet A. 2009. Different dietary restriction regimens extend lifespan by both independent  
854 and overlapping genetic pathways in *C. elegans*. Aging Cell. 8:113–127. doi:10.1111/j.1474-  
855 9726.2009.00459.x. [accessed 2018 Jan 5].  
856 <https://www.ncbi.nlm.nih.gov/pmc/articles/PMC2680339/pdf/ace0008-0113.pdf>.
- 857 Hahm J, Kim S, Diloreto R, Shi C, Lee S V, Murphy CT, Nam HG. 2015. *C. elegans* maximum velocity  
858 correlates with healthspan and is maintained in worms with an insulin receptor mutation. Nat Commun.  
859 6:1–7. doi:10.1038/ncomms9919. <http://dx.doi.org/10.1038/ncomms9919>.

- 860 Hedgecock EM, Russell RL. 1975. Normal and mutant thermotaxis in the nematode *Caenorhabditis*  
861 *elegans*. *Proc Natl Acad Sci U S A*. 72(10):4061–4065. doi:10.1073/pnas.72.10.4061. [accessed 2021 May  
862 2]. [/pmc/articles/PMC433138/?report=abstract](https://pmc/articles/PMC433138/?report=abstract).
- 863 Huang J, Rathod V, Sun C, Zhu M, Korattikara A, Fathi A, Fischer I, Wojna Z, Song Y, Guadarrama S, et al.  
864 2017. Speed/accuracy trade-offs for modern convolutional object detectors. In: *Proceedings - 30th IEEE*  
865 *Conference on Computer Vision and Pattern Recognition, CVPR 2017*. Vol. 2017-Janua. Institute of  
866 Electrical and Electronics Engineers Inc. p. 3296–3305.
- 867 Hung J, Ravel D, Lopes SCP, Rangel G, Nery OA, Malleret B, Nosten F, Lacerda MVG, Ferreira MU, Rénia L,  
868 et al. 2018. Applying Faster R-CNN for Object Detection on Malaria Images.  
869 <http://arxiv.org/abs/1804.09548>.
- 870 Javer A, Currie M, Lee CW, Hokanson J, Li K, Martineau CN, Yemini E, Grundy LJ, Li C, Ch'ng QL, et al.  
871 2018. An open-source platform for analyzing and sharing worm-behavior data. *Nat Methods*. 15(9):645–  
872 646. doi:10.1038/s41592-018-0112-1.
- 873 Jung S-K, Aleman-Meza B, Riepe C, Zhong W. 2014. QuantWorm: A Comprehensive Software Package for  
874 *Caenorhabditis elegans* Phenotypic Assays. Hendricks M, editor. *PLoS One*. 9(1):e84830.  
875 doi:10.1371/journal.pone.0084830. [accessed 2021 Jan 26].  
876 <https://dx.plos.org/10.1371/journal.pone.0084830>.
- 877 Krakauer JW, Ghazanfar AA, Gomez-Marin A, Maclver MA, Poeppel D. 2017. Neuroscience Needs  
878 Behavior: Correcting a Reductionist Bias. *Neuron*. 93(3):480–490. doi:10.1016/j.neuron.2016.12.041.  
879 [accessed 2021 Jan 23]. <http://dx.doi.org/10.1016/j.neuron.2016.12.041>.
- 880 Le KN, Zhan M, Cho Y, Wan J, Patel DS, Lu H. 2020. An automated platform to monitor long-term  
881 behavior and healthspan in *Caenorhabditis elegans* under precise environmental control. *Commun Biol*.  
882 3(1):1–13. doi:10.1038/s42003-020-1013-2. [accessed 2021 Jan 12].  
883 <https://www.nature.com/articles/s42003-020-1013-2>.
- 884 Lin TY, Maire M, Belongie S, Hays J, Perona P, Ramanan D, Dollár P, Zitnick CL. 2014. Microsoft COCO:  
885 Common objects in context. In: *Lecture Notes in Computer Science (including subseries Lecture Notes in*  
886 *Artificial Intelligence and Lecture Notes in Bioinformatics)*. Vol. 8693 LNCS. Springer Verlag. p. 740–755.  
887 [accessed 2021 Jan 12]. <https://arxiv.org/abs/1405.0312v3>.
- 888 Maia Chagas A, Prieto-Godino LL, Arrenberg AB, Baden T, Mathur N, Delfosse K, Doherty T. 2017. The  
889 €100 lab: A 3D-printable open-source platform for fluorescence microscopy, optogenetics, and accurate  
890 temperature control during behaviour of zebrafish, *Drosophila*, and *Caenorhabditis elegans*. *PLOS Biol*.  
891 15(7):e2002702. doi:10.1371/journal.pbio.2002702. [accessed 2017 Jul 25].  
892 <http://dx.plos.org/10.1371/journal.pbio.2002702>.
- 893 Mair W, Goymer P, Pletcher SD, Partridge L. 2003. Demography of dietary restriction and death in  
894 *Drosophila*. *Science (80- )*. 301(5640):1731–1733. doi:10.1126/science.1086016.
- 895 Mathew MD, Mathew ND, Ebert PR. 2012. WormScan: A Technique for High-Throughput Phenotypic  
896 Analysis of *Caenorhabditis elegans*. Lehner B, editor. *PLoS One*. 7(3):e33483.  
897 doi:10.1371/journal.pone.0033483. [accessed 2021 Jan 27].  
898 <https://dx.plos.org/10.1371/journal.pone.0033483>.
- 899 Mendel JE, Korswagen HC, Liu KS, Hajdu-Cronin YM, Simon MI, Plasterk RHA, Sternberg PW. 1995.  
900 Participation of the protein Go in multiple aspects of behavior in *C. elegans*. *Science (80- )*.

- 901 267(5204):1652–1655. doi:10.1126/science.7886455. [accessed 2021 Jan 26].  
902 <https://pubmed.ncbi.nlm.nih.gov/7886455/>.
- 903 Niepoth N, Bendesky A. 2020. How Natural Genetic Variation Shapes Behavior. doi:10.1146/annurev-  
904 genom-111219. [accessed 2021 Jan 13]. <https://doi.org/10.1146/annurev-genom-111219->.
- 905 Perni M, Challa PK, Kirkegaard JB, Limbocker R, Koopman M, Hardenberg MC, Sormanni P, Müller T, Saar  
906 KL, Roode LWY, et al. 2018. Massively parallel *C. elegans* tracking provides multi-dimensional  
907 fingerprints for phenotypic discovery. *J Neurosci Methods*. 306:57–67.  
908 doi:10.1016/j.jneumeth.2018.02.005. <https://doi.org/10.1016/j.jneumeth.2018.02.005>.
- 909 Ren S, He K, Girshick R, Sun J. 2015. Faster R-CNN: Towards Real-Time Object Detection with Region  
910 Proposal Networks. [accessed 2020 Oct 19]. <https://github.com/>.
- 911 Riddle DL, Blumenthal T, Meyer BJ et al., editor. 1997. Section I, Introduction. Title. In: *C. elegans* II. 2nd  
912 ed. Cold Spring Harbor (NY): Cold Spring Harbor Laboratory Press.  
913 <https://www.ncbi.nlm.nih.gov/books/NBK20121/>.
- 914 Schafer WR. 2005. Egg-laying. *WormBook*:1–7. doi:10.1895/wormbook.1.38.1.
- 915 Ségalat L, Elkes DA, Kaplan JM. 1995. Modulation of serotonin-controlled behaviors by Go in  
916 *Caenorhabditis elegans*. *Science* (80- ). 267(5204):1648–1651. doi:10.1126/science.7886454. [accessed  
917 2021 Jan 26]. <https://pubmed.ncbi.nlm.nih.gov/7886454/>.
- 918 Sofela S, Sahloul S, Rafeie M, Kwon T, Han J, Warkiani ME, Song YA. 2018. High-throughput sorting of  
919 eggs for synchronization of: *C. elegans* in a microfluidic spiral chip. *Lab Chip*. 18(4):679–687.  
920 doi:10.1039/c7lc00998d. [accessed 2021 Jan 26].  
921 <https://pubs.rsc.org/en/content/articlehtml/2018/lc/c7lc00998d>.
- 922 Stephens GJ, Johnson-Kerner B, Bialek W, Ryu WS, Green D, Swets J, Geng W, Cosman P, Baek J, Berry C,  
923 et al. 2008. Dimensionality and Dynamics in the Behavior of *C. elegans*. Sporns O, editor. *PLoS Comput*  
924 *Biol*. 4(4):e1000028. doi:10.1371/journal.pcbi.1000028. [accessed 2017 Feb 7].  
925 <http://dx.plos.org/10.1371/journal.pcbi.1000028>.
- 926 Stern S, Kirst C, Bargmann CI. 2017. Neuromodulatory Control of Long-Term Behavioral Patterns and  
927 Individuality across Development. *Cell*. 171(7):1649–1662.e10. doi:10.1016/j.cell.2017.10.041. [accessed  
928 2018 Jan 4]. <http://www.ncbi.nlm.nih.gov/pubmed/29198526>.
- 929 Stiernagle T. 2006. Maintenance of *C. elegans*. *WormBook*:1–11. doi:10.1895/wormbook.1.101.1.
- 930 Stroustrup N, Ulmschneider BE, Nash ZM, López-Moyado IF, Apfeld J, Fontana W. 2013. The  
931 *Caenorhabditis elegans* Lifespan Machine. *Nat Methods*. 10(7):665–70. doi:10.1038/nmeth.2475.  
932 <http://dx.doi.org/10.1038/nmeth.2475>.
- 933 Swierczek NA, Giles AC, Rankin CH, Kerr RA. 2011. High-throughput behavioral analysis in *C. elegans*. *Nat*  
934 *Methods*. 8(7):592–602. doi:10.1038/nmeth.1625.
- 935 Trent C, Tsung N, Horvitz HR. 1983. EGG-LAYING DEFECTIVE MUTANTS OF THE NEMATODE  
936 *CAENORHABDITIS ELEGANS*. *Genetics*. 104(4).
- 937 Waggoner LE, Zhou GT, Schafer RW, Schafer WR. 1998. Control of alternative behavioral states by  
938 serotonin in *Caenorhabditis elegans*. *Neuron*. 21(1):203–214. doi:10.1016/S0896-6273(00)80527-9.  
939 [accessed 2021 Jan 26]. <http://www.cell.com/article/S0896627300805279/fulltext>.

- 940 Wählby C, Kamentsky L, Liu Z, Riklin-Raviv T, Conery A. 2012. An image analysis toolbox for high-  
941 throughput *C. elegans* assays. *Nat Methods*. 9.
- 942 Zhang WB, Sinha DB, Pittman WE, Hvatum E, Stroustrup N, Pincus Z. 2016. Extended Twilight among  
943 Isogenic *C. elegans* Causes a Disproportionate Scaling between Lifespan and Health. *Cell Syst*. 3(4):333–  
944 345. doi:10.1016/j.cels.2016.09.003. <http://dx.doi.org/10.1016/j.cels.2016.09.003>.
- 945 Zhao Y, Long L, Xu W, Campbell RF, Large EE, Greene JS, McGrath PT. 2018. Changes to social feeding  
946 behaviors are not sufficient for fitness gains of the *Caenorhabditis elegans* N2 reference strain. *Elife*. 7.  
947 doi:10.7554/eLife.38675.
- 948 Zheng M, Gorelenkova O, Yang J, Feng Z. 2012. A liquid phase based *C. elegans* behavioral analysis  
949 system identifies motor activity loss in a nematode Parkinson’s disease model. *J Neurosci Methods*.  
950 204(2):234–237. doi:10.1016/j.jneumeth.2011.11.015.
- 951

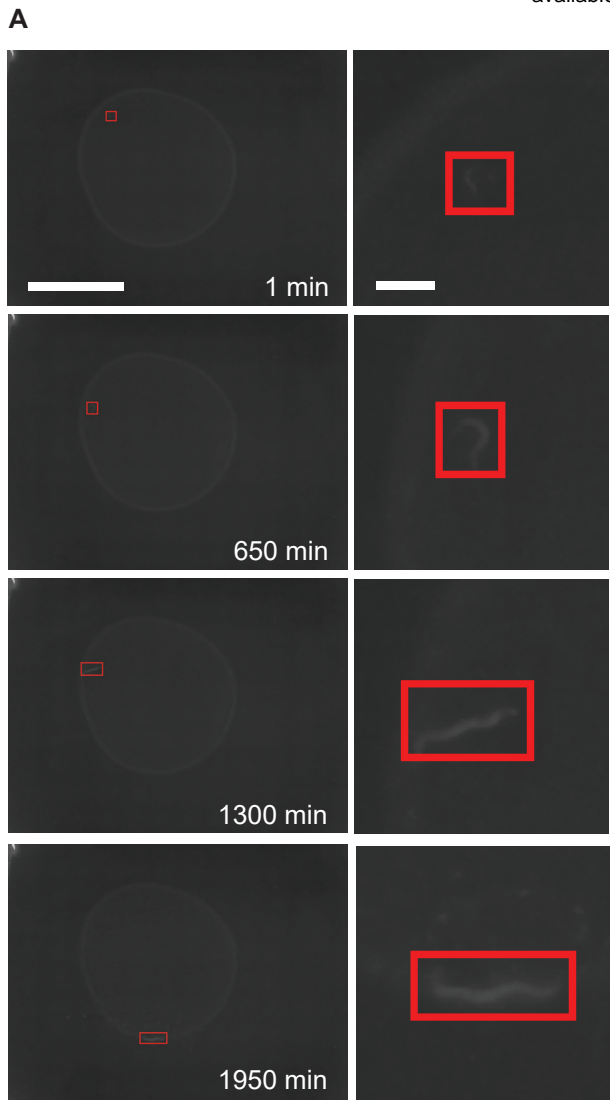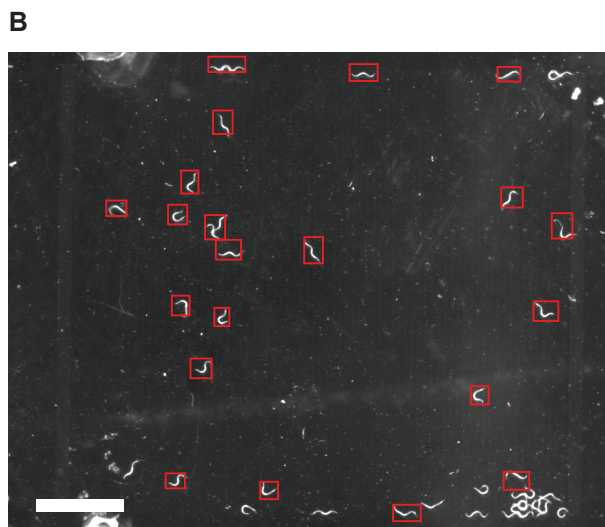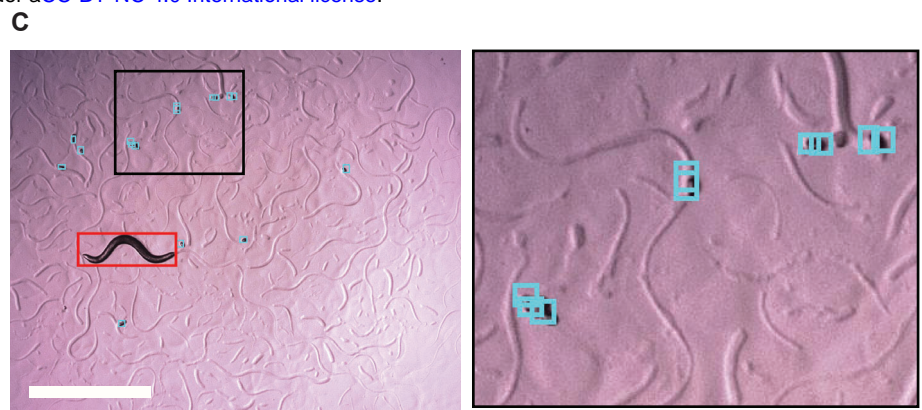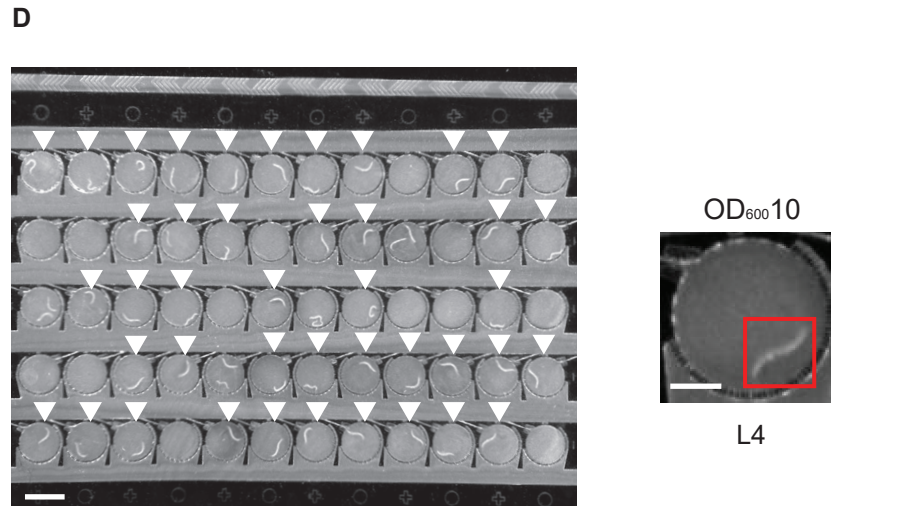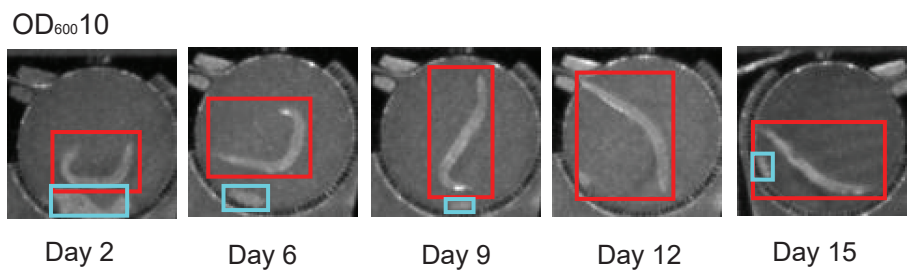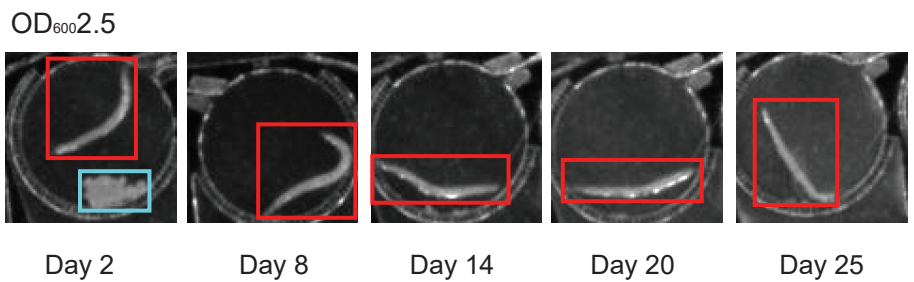

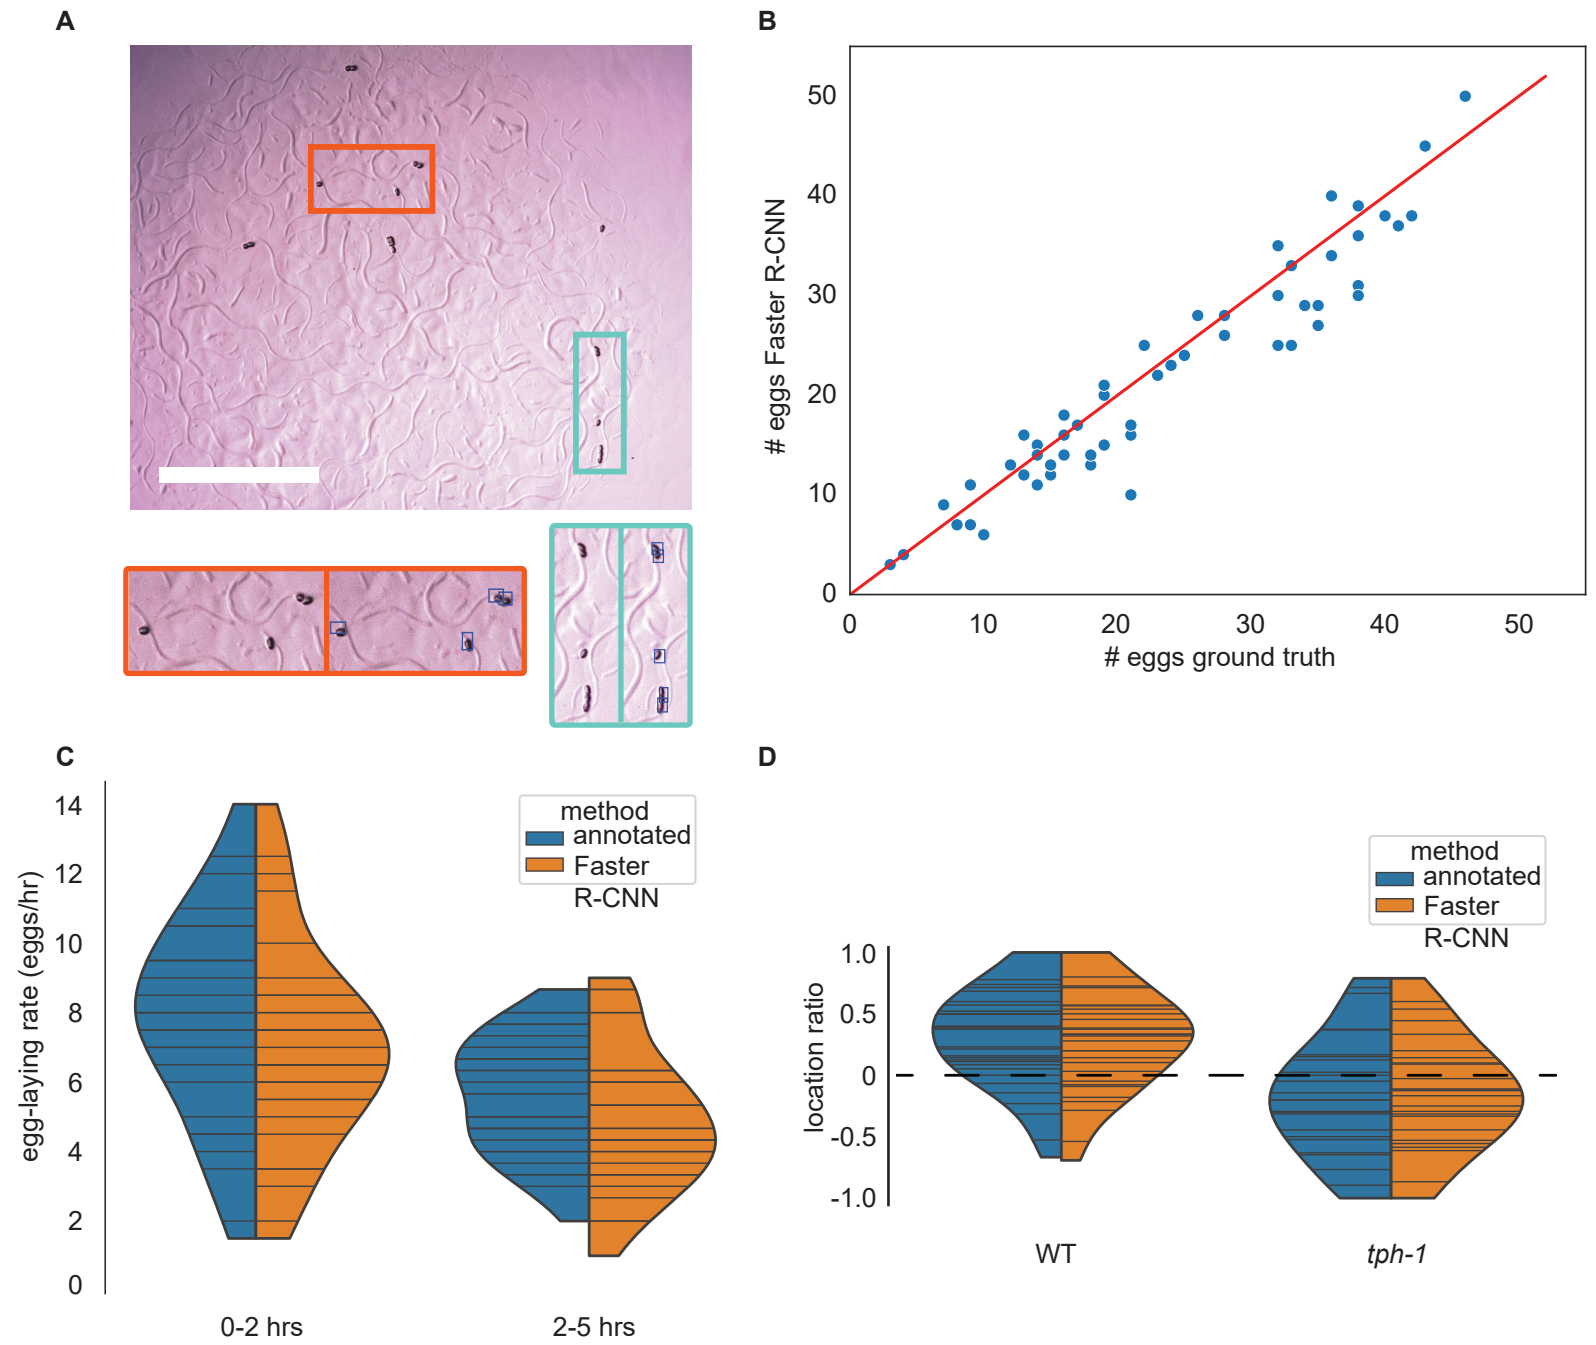

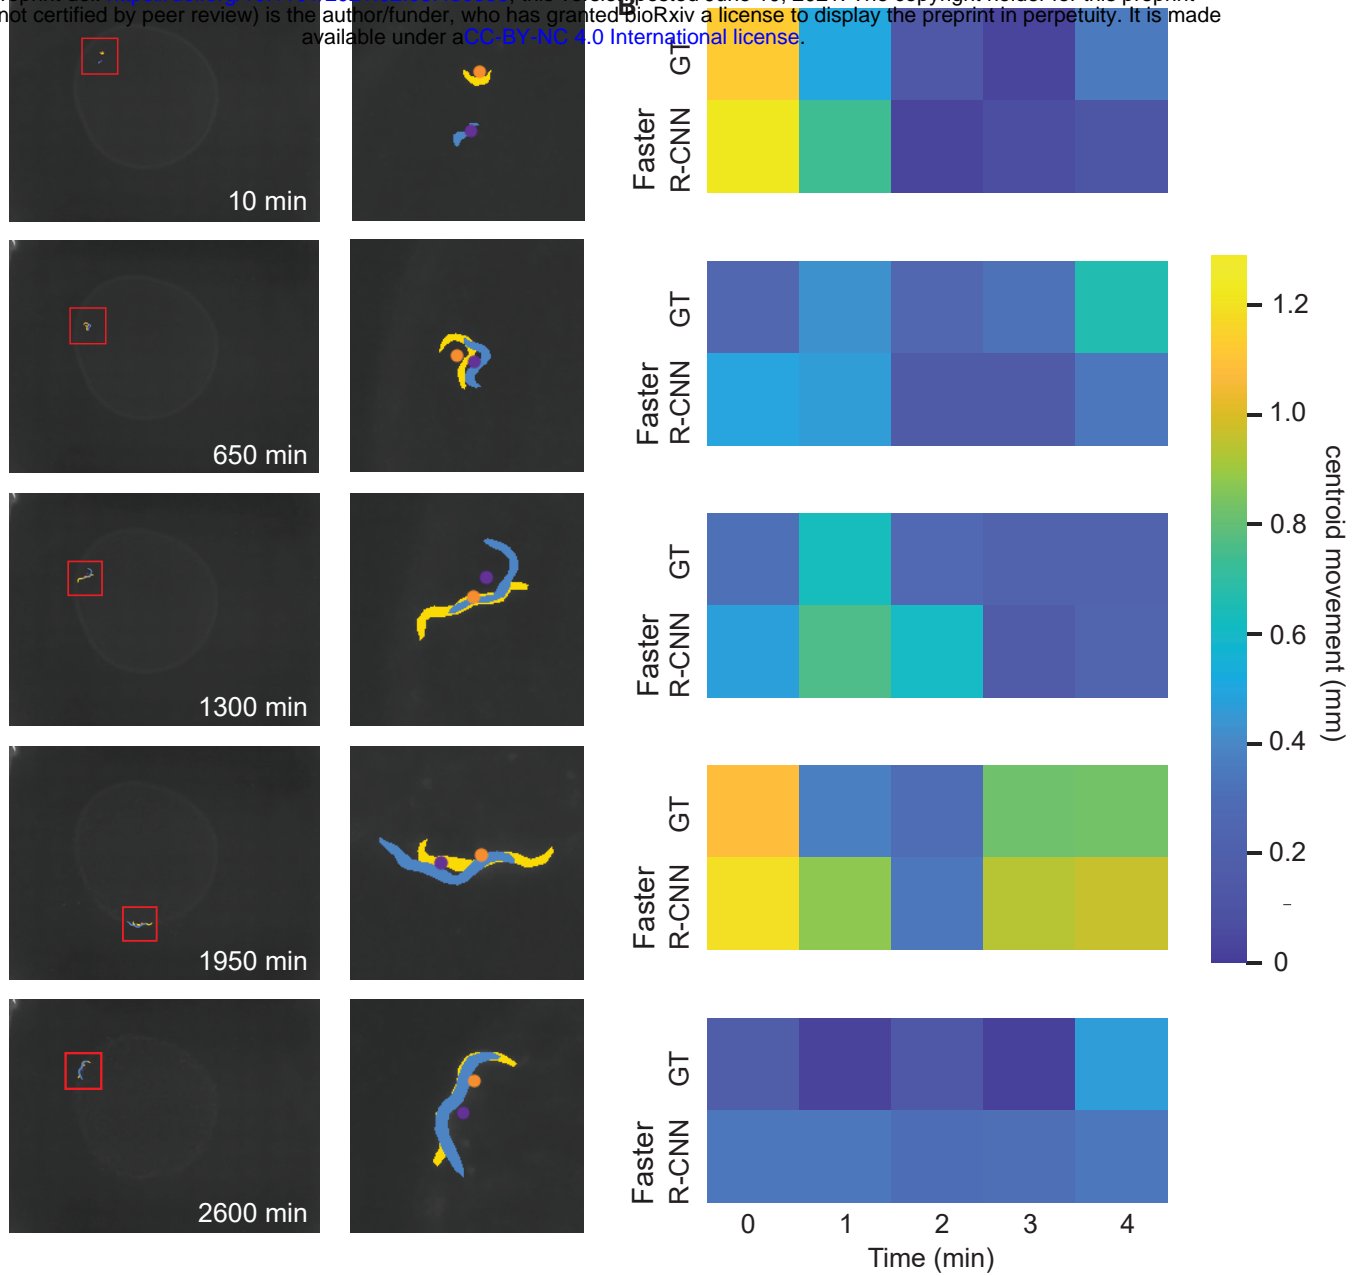

■ annotated initial time   ■ Faster R-CNN initial time   ■ annotated final time   ■ Faster R-CNN final time

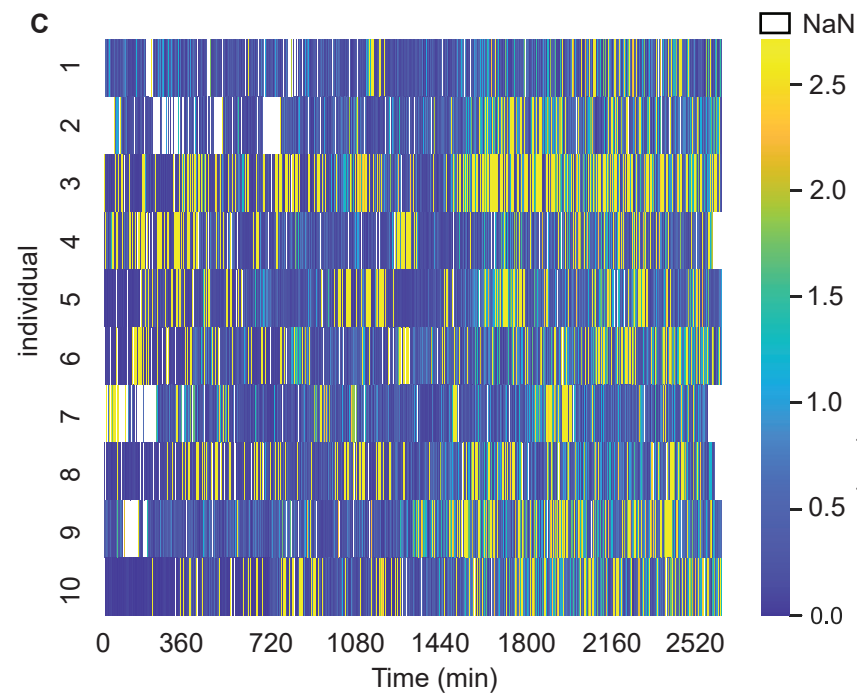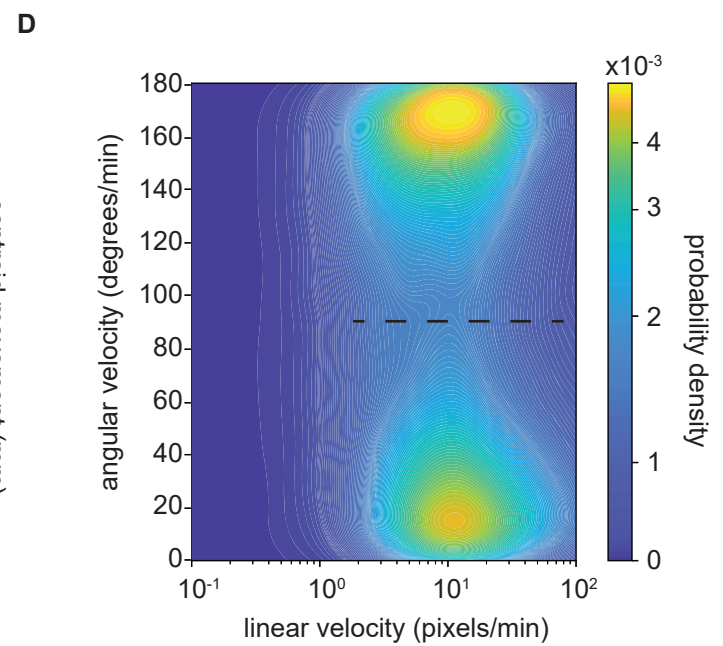

# Figure 4

**A**

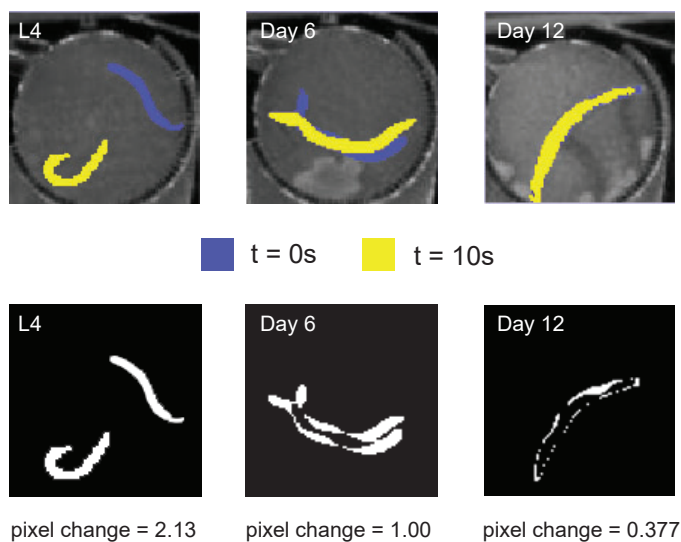

**B**

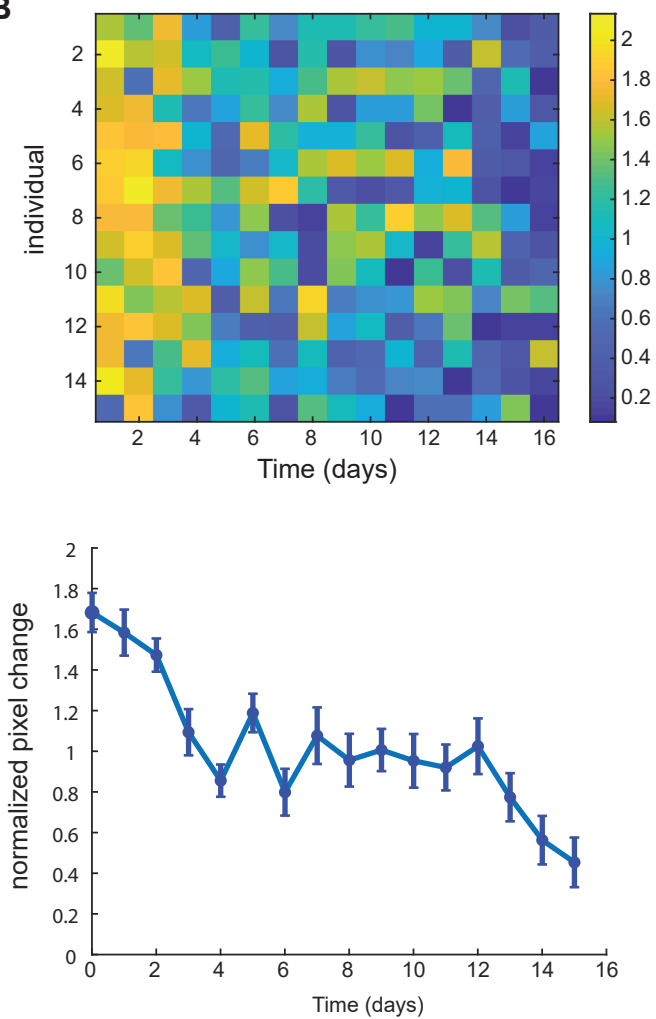

**C**

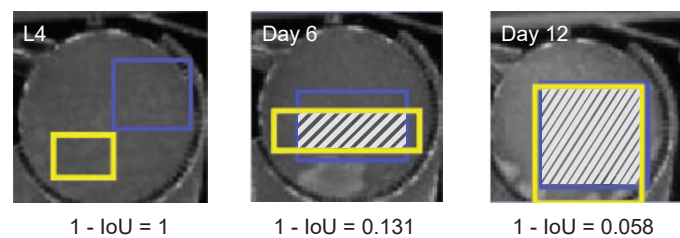

**D**

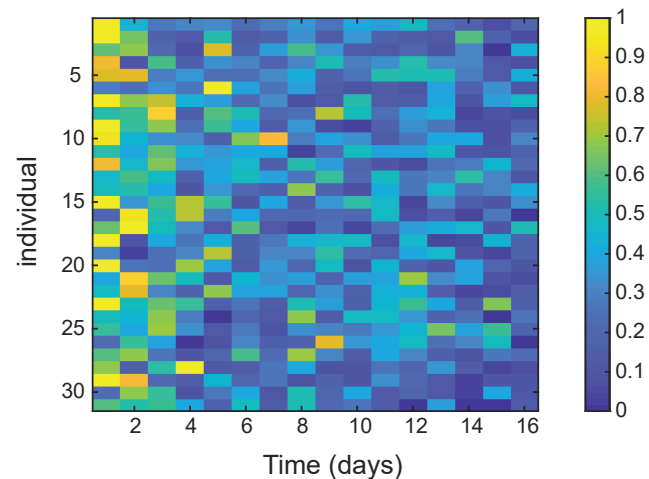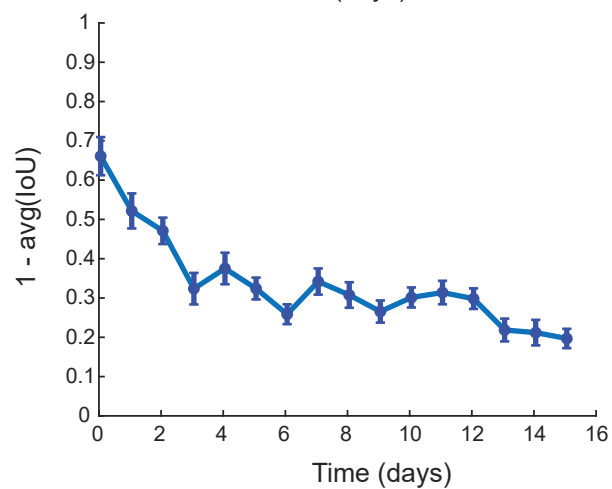

**E**

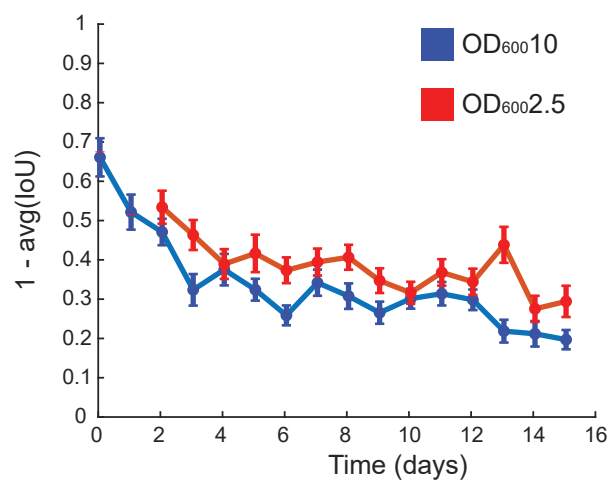

Source: https://www.biorxiv.org/content/10.1101/2021.02.08.430359v2.full.pdf
